# Supplementary material for: New Observations of Upper Tropospheric NO 2 from TROPOMI
Source: Copernicus journal article supplement (doi:10.5194/amt-2020-399), 2020-10-08
Supplement: Supplementary file [file amt-2020-399-AC1-supplement.zip]

# New Observations of Upper Tropospheric NO<sub>2</sub> from TROPOMI

Eloise A. Marais<sup>1,2</sup>, John F. Roberts<sup>3</sup>, Robert G. Ryan<sup>4,5,\*</sup>, Henk Eskes<sup>6</sup>, K. Folkert Boersma<sup>6,7</sup>, Sungyeon Choi<sup>8,9</sup>, Joanna Joiner<sup>8</sup>, Nader Abuhassan<sup>8,10</sup>, Alberto Redondas<sup>11</sup>, Michel Grutter<sup>12</sup>, Alexander Cede<sup>13</sup>, Laura Gomez<sup>14,15</sup>, Monica Navarro-Comas<sup>14</sup>

<sup>1</sup>Department of Geography, University College London, London, UK

<sup>2</sup>School of Physics and Astronomy, University of Leicester, Leicester, UK

<sup>3</sup>Centre for Landscape and Climate Research, University of Leicester, Leicester, UK

<sup>4</sup>School of Earth Sciences, The University of Melbourne, Melbourne, Australia

<sup>5</sup>ARC Centre of Excellence for Climate System Science, Sydney, Australia

<sup>6</sup>Satellite Observations Department, Royal Netherlands Meteorological Institute (KNMI), De Bilt, the Netherlands

<sup>7</sup>Meteorology and Air Quality Group, Wageningen University (WUR), Wageningen, the Netherlands

<sup>8</sup>NASA Goddard Space Flight Center, Greenbelt, MD, USA

<sup>9</sup>Science Systems and Applications, Inc., Lanham, MD, USA

<sup>10</sup>Joint Center for Earth Systems Technology, University of Maryland, Baltimore County, Baltimore, MD, USA

<sup>11</sup>Izaña Atmospheric Research Center, AEMET, Tenerife, Canary Islands, Spain

<sup>12</sup>Centro de Ciencias de la Atmósfera, Universidad Nacional Autónoma de México, Mexico City, Mexico

<sup>13</sup>LuftBlick, Fritz-Konzert-Straße 4, Innsbruck, Austria

<sup>14</sup>Instituto Nacional de Técnica Aeroespacial (INTA), Área de Investigación e Instrumentación Atmosférica, Madrid, Spain

<sup>15</sup>Groupe de Spectrométrie Moléculaire et Atmosphérique, URM CNRS 7331, UFR Sciences Exactes et Naturelles, Moulin de la Housse, BP 1039, 51687 Reims CEDEX 2, France

<sup>\*</sup>Now at Department of Geography, University College London, London, UK

Correspondence to: Eloise A. Marais (e.marais@ucl.ac.uk)

**Abstract.** Nitrogen oxides (NO<sub>x</sub> ≡ NO + NO<sub>2</sub>) in the NO<sub>x</sub>-limited upper troposphere (UT) are long-lived and so have a large influence on the oxidizing capacity of the troposphere and formation of the greenhouse gas ozone. Models misrepresent NO<sub>x</sub> in the UT and observations to address deficiencies in models are sparse. Here we obtain a year of near-global seasonal mean mixing ratios of NO<sub>2</sub> in the UT (450-180 hPa) at 1° × 1° by applying cloud-slicing to partial columns of NO<sub>2</sub> from TROPOMI. This follows refinement of the cloud-slicing algorithm with synthetic partial columns from the GEOS-Chem chemical transport model. TROPOMI, prior to cloud-slicing, is corrected for a 13% underestimate in stratospheric NO<sub>2</sub> variance and a 50% overestimate in free tropospheric NO<sub>2</sub> determined by comparison to Pandora total columns at high-altitude free tropospheric sites at Mauna Loa, Izaña and Altimoni, and MAX-DOAS and Pandora tropospheric columns at Izaña. Two cloud-sliced seasonal mean UT NO<sub>2</sub> products for June 2019 to May 2020 are retrieved from corrected TROPOMI total columns using distinct TROPOMI cloud products that assume clouds are reflective boundaries (FRESCO-S) or water droplet layers (ROCINN-CAL). TROPOMI UT NO<sub>2</sub> typically ranges from 20-30 pptv over remote oceans to >80 pptv over locations with intense seasonal lightning. Spatial coverage is mostly in the tropics and subtropics with FRESCO-S and extends to the midlatitudes and polar regions with ROCINN-CAL, due to its greater abundance of optically thick clouds and wider cloud top altitude range. TROPOMI UT NO<sub>2</sub> seasonal means are spatially consistent (R = 0.6-0.8) with an existing coarser spatial resolution (5° latitude × 8° longitude) UT NO<sub>2</sub> product from the Ozone Monitoring Instrument (OMI). UT NO<sub>2</sub> from

**Deleted:** Ctra Ajalvir km4, 28850, Torrejón de Ardoz,

**Deleted:** We find that synthetic cloud-sliced UT NO<sub>2</sub> are spatially consistent (R = 0.64) with UT NO<sub>2</sub> calculated across the same cloud pressure range and scenes as are cloud-sliced ("true" UT NO<sub>2</sub>), but the cloud-sliced UT NO<sub>2</sub> is 11-22% more than the "true" all-sky seasonal mean. The largest contributors to differences between synthetic cloud-sliced and "true" UT NO<sub>2</sub> are target resolution of the cloud-sliced product and uniformity of overlying stratospheric NO<sub>2</sub>.

**Deleted:** in

TROPOMI is 12-26 pptv more than that from OMI due to increase in NO<sub>2</sub> with altitude from the OMI pressure ceiling (280 hPa) to that for TROPOMI (180 hPa), but possibly also [due to altitude differences in TROPOMI and OMI cloud products and retrieval algorithms](#). The TROPOMI UT NO<sub>2</sub> product offers potential to evaluate and improve representation of UT NO<sub>x</sub> in models and supplement aircraft observations that are sporadic and susceptible to large biases in the UT.

Deleted: systematic

Deleted: between the

## 1 Introduction

Nitrogen oxides (NO<sub>x</sub> ≡ NO + NO<sub>2</sub>) in the upper troposphere (UT; ~8-12 km) influence the oxidizing capacity of the atmosphere and global climate, as the formation and radiative forcing of tropospheric ozone are most efficient in the [predominantly](#) NO<sub>x</sub>-limited UT (Mickley et al., 1999; Bradshaw et al., 2000; Dahlmann et al., 2011; Worden et al., 2011).

Sources of NO<sub>x</sub> to the UT include local emissions from lightning and cruising altitude aircraft, deep convective uplift of surface pollution, downwelling from the stratosphere, long-range transport, and chemical recycling of NO<sub>x</sub> from stable reservoir compounds (Ehhalt et al., 1992; Lamarque et al., 1996; Schumann, 1997; Jaeglé et al., 1998; Bradshaw et al., 2000; Bertram et al., 2007). The lifetime of NO<sub>x</sub> in the UT varies from a few hours to a few days depending on availability of hydrogen oxides (HO<sub>x</sub> ≡ OH + HO<sub>2</sub>) and peroxy radicals (RO<sub>2</sub>) to convert NO<sub>x</sub> to reservoir compounds (Jaeglé et al., 1998; Bradshaw et al., 2000; Nault et al., 2016).

Current understanding of UT NO<sub>x</sub> is erroneous, as demonstrated by misrepresentation in chemical transport models (CTMs) of the vertical distribution, relative abundance (ratios of NO-to-NO<sub>2</sub>), and absolute magnitude of UT NO<sub>x</sub> when compared to in situ measurements from research aircraft (Boersma et al., 2011; Travis et al., 2016; Silvern et al., 2018). Models are used to determine the contribution of ozone to anthropogenic climate change in the absence of reliable historical measurements (Pavelin et al., 1999). Models also provide prior information about the vertical distribution of NO<sub>2</sub> for retrieval of vertical column densities of NO<sub>2</sub> from space-based UV-visible instruments. Errors in these retrievals are particularly vulnerable to biases in modelled UT NO<sub>2</sub>, due to greater sensitivity of space-based observations to the UT than the middle and lower troposphere (Travis et al., 2016; Silvern et al., 2019). This impedes accurate top-down inference of air quality variability, surface concentrations and precursor emissions (Stavrakou et al., 2013; Silvern et al., 2019). Models include heavily parameterized representation of lightning (Tost et al., 2007; Allen et al., 2010; Ott et al., 2010; Murray et al., 2012; Murray et al., 2013), the largest global influencer of NO<sub>x</sub> in the UT (Bradshaw et al., 2000; Marais et al., 2018), and may misrepresent the reaction kinetics and physical processing of NO<sub>x</sub> for the cold, low-pressure conditions of the UT (Chang et al., 2011; Henderson et al., 2011; Henderson et al., 2012; Stavrakou et al., 2013; Amedro et al., 2019).

Observations that have been used to better understand UT NO<sub>x</sub> are mostly limited to research and commercial aircraft campaigns. For research aircraft, the record of observations in the UT since the early 1990s have been sustained almost exclusively by the NASA DC8 plane, with recent contributions from the German High Altitude and Long Range Research

Aircraft (HALO) (Wendisch et al., 2016). There are also commercial aircraft campaigns, but these are ~~mostly limited to~~ heavily trafficked flight corridors, ~~that~~ are often in the stratosphere at cruising altitude (Thomas et al., 2015; Stratmann et al., 2016). In situ measurements of NO<sub>2</sub> in the UT can also be biased by interference from NO<sub>x</sub> reservoir compounds that thermally decompose to NO<sub>2</sub> in the instrument inlet (Browne et al., 2011; Reed et al., 2016). Standard remote sensing products of NO<sub>2</sub> from space-based nadir- and limb-viewing instruments provide global coverage, but either as a single piece of vertical information in the troposphere in the nadir as tropospheric column densities (Levelt et al., 2018) or as vertically resolved NO<sub>2</sub> in the limb limited to NO<sub>2</sub> abundances above the tropopause (Newchurch et al., 1996; Brogniez et al., 2002; Sioris et al., 2004; Brohede et al., 2007; Jones et al., 2012; Dubé et al., 2020).

Near-global research products of seasonal mean vertically resolved tropospheric NO<sub>2</sub> have been retrieved by applying the cloud-slicing technique to partial columns of NO<sub>2</sub> from the space-based Ozone Monitoring Instrument (OMI) (Choi et al., 2014; Belmonte-Rivas et al., 2015). Cloud-slicing involves regressing clusters of partial NO<sub>2</sub> columns above optically thick clouds against corresponding cloud top pressures. The resultant regression slopes are converted to NO<sub>2</sub> mixing ratios that represent average NO<sub>2</sub> across the cloud top altitude range (Ziemke et al., 2001). The advantages of cloud-slicing include enhanced signal over bright optically thick clouds (van der A et al., 2020) and removal of the dry stratosphere due to lack of clouds there. Near-global multiyear (2005-2007) seasonal means of UT NO<sub>2</sub> from cloud-sliced OMI partial columns have been shown to reproduce the spatial variability of UT NO<sub>2</sub> measured with bias-corrected NASA DC8 aircraft measurements of NO<sub>2</sub> over North America, though at very coarse scales (seasonal, 32° × 20°) (Marais et al., 2018). Even so, the OMI product confirms the dominant global influence of lightning on UT NO<sub>x</sub> and provides global constraints on lightning NO<sub>x</sub> production rates (280 ± 80 moles NO<sub>x</sub> per lightning flash) and annual lightning NO<sub>x</sub> emissions (5.9 ± 1.7 Tg N) (Marais et al., 2018). OMI pixels are at relatively coarse resolution (13 km × 24 km at nadir) and there is substantial data loss after 2007 due to the so-called row anomaly (Schenkeveld et al., 2017; Torres et al., 2018). The recently launched (October 2017) TROPOMI instrument on the Sentinel-5P satellite has the same spatial coverage as pre-row-anomaly OMI (swath width of 2600 km), but with a finer nadir pixel resolution of 7.2 km × 3.5 km (along track × across track) until 5 August 2019, further refined thereafter to 5.6 km × 3.5 km (Argyrouli et al., 2019). This offers better cloud-resolving capability and greater data pixel density than OMI with potential to retrieve finer resolution NO<sub>2</sub> in the UT.

Here we refine and test the cloud-slicing retrieval using synthetic partial NO<sub>2</sub> columns from the GEOS-Chem CTM before retrieving UT NO<sub>2</sub> from TROPOMI partial NO<sub>2</sub> columns with cloud information from two distinct TROPOMI cloud products. Application of cloud-slicing to TROPOMI follows evaluation of TROPOMI total, stratospheric and tropospheric columns with ground-based measurements of NO<sub>2</sub> from Pandora and Multi-axis differential optical absorption spectroscopy (MAX-DOAS) at free tropospheric monitoring sites. We also evaluate TROPOMI UT NO<sub>2</sub> with the OMI UT NO<sub>2</sub> product.

**Deleted:** prevalent over

**Deleted:** and

115 **2 Cloud-slicing of GEOS-Chem synthetic partial columns**

Targeting cloudy scenes could yield representation errors in NO<sub>2</sub> mixing ratios in the UT, due to the influence of clouds on NO<sub>x</sub> photochemistry (Holmes et al., 2019), large enhancements in NO<sub>x</sub> from lightning and convective uplift of surface pollution that accompany cloud formation (Price and Rind, 1992; Bertram et al., 2007), and low sampling frequency due to strict data filtering (Choi et al., 2014). We test the ability of the cloud-slicing technique to return accurate, representative  
120 mixing ratios of NO<sub>2</sub> in the UT by applying this technique to synthetic partial columns from GEOS-Chem. The “true” NO<sub>2</sub> used to evaluate cloud-sliced NO<sub>2</sub> is obtained by averaging NO<sub>2</sub> across the same vertical range as the cloud-sliced NO<sub>2</sub> for the same cloudy model grid squares as are cloud-sliced (“true” cloudy UT NO<sub>2</sub>) and for all clear and cloudy model grid squares (“true” all-sky UT NO<sub>2</sub>).

125 Synthetic NO<sub>2</sub> are from GEOS-Chem version 12.1.0 (<https://doi.org/10.5281/zenodo.1553349>; accessed 10 August 2019) simulated at a horizontal resolution of 0.25° × 0.3125° (latitude × longitude) extending over 47 vertical layers from the surface to 0.01 hPa for the nested domains available in version 12.1.0. These include North America (9.75-60°N, 130-60°W), western Europe (30-70°N, 15°W-61.25°E), and Southeast Asia (15-55°N, 70-140°E). Dynamic (3-hourly) boundary conditions are from a coarse resolution (4° × 5°) global GEOS-Chem simulation. The model is driven with NASA GEOS-FP assimilated  
130 meteorology and includes comprehensive emission inventories from anthropogenic and natural sources. These include local emissions of NO<sub>x</sub> in the UT from lightning as described by Murray et al. (2012) and from aircraft using the Aviation Emissions Inventory Code (AEIC) inventory detailed in Stettler et al. (2011). The model is simulated in boreal summer (June-August) when variability in UT NO<sub>x</sub> in all nested domains is dominated by lightning (Marais et al., 2018). The model is sampled daily at 12h00-15h00 local time (LT) to be consistent with the TROPOMI overpass time (13h30 LT). Two years (2016 and 2017)  
135 are simulated to increase data density. The model years predate TROPOMI, but this has no bearing on assessment of the cloud-slicing technique.

The cloud-slicing approach we apply to synthetic partial columns above synthetic clouds to estimate seasonal means of UT NO<sub>2</sub> is the same as will be applied to TROPOMI, so model variables are only used if these are also available in or can be  
140 derived from publicly available TROPOMI data products. GEOS-Chem daily partial NO<sub>2</sub> column densities (stratosphere + partial troposphere) and the corresponding GEOS-FP cloud top pressures at 450-180 hPa and 0.25° × 0.3125° are gathered into grid squares of the target resolution of 4° × 5°. Any 4° × 5° grids of gathered pixels with non-uniform, overlying stratospheric column NO<sub>2</sub> are discarded, as diagnosed with a strict stratospheric column NO<sub>2</sub> relative standard deviation of 0.02. Variability in stratospheric NO<sub>2</sub> is mostly from oxidation of nitrous oxide (N<sub>2</sub>O) in the mid-stratosphere (Crutzen, 1970). Its variability is dominated by solar insolation and stratospheric circulation, but is also influenced by upwelling from the troposphere and downwelling from the mesosphere (Randall et al., 1998; Gruzdev and Elokhov, 2011). GEOS-FP thermal  
145 tropopause heights are used to determine the vertical extent of the stratosphere in the model. As many as 256 0.25° × 0.3125°

Deleted: last

Deleted: These

Deleted: are then screened to remove

Deleted: clusters with non-uniform

Deleted: GEOS-Chem stratospheric NO<sub>2</sub> (

Deleted: >

Deleted: )

Deleted: using

Deleted: For a target resolution of 4° × 5° clusters of a

partial columns can be gathered in a  $4^\circ \times 5^\circ$  grid, so we increase the number of possible cloud-sliced  $\text{NO}_2$  retrievals by subdividing clusters of at least 100 partial  $\text{NO}_2$  columns into clusters of at least 40. A threshold of 80 instead of 100 yields similar seasonal mean UT  $\text{NO}_2$ . Subdividing the clusters of partial columns doubles the number of cloud-sliced  $\text{NO}_2$  data used to obtain multiyear seasonal means. Additional filtering is applied to clusters to remove extreme  $\text{NO}_2$  partial columns (partial columns falling outside the 10<sup>th</sup> to 90<sup>th</sup> percentile range) that have a large influence on regression of  $\text{NO}_2$  partial columns against cloud top pressures, clusters with fewer than 10 partial columns after screening for extreme values, and clusters that do not extend across a sufficiently wide altitude range (cloud top pressure range  $\leq 140$  hPa and standard deviation  $\leq 30$  hPa). GEOS-Chem cloud top heights are diagnosed in the model as the pressure at the top edge of the highest model layer of GEOS-FP upward moist convective mass flux.

**Deleted:** are likely

**Deleted:** scenes

**Deleted:** This

The slope of the relationship between cloud top heights and partial columns for each cluster is estimated with reduced major axis (RMA) regression and the standard deviation of the slope, obtained with bootstrap resampling, is used as the error estimate of the slope. Additional filtering is applied to retain slopes that have low relative error (relative error on the slope  $\leq 1.0$ ). We find that a relatively large proportion of slopes (15%) are negative and would yield negative cloud-sliced UT  $\text{NO}_2$ . Most of these occur over remote regions with low  $\text{NO}_2$  concentrations. These are diagnosed as slopes significantly less than zero (sum of slope and slope error  $< 0$ ) and removed. The retained slopes and errors (in molecules  $\text{cm}^{-2}$  hPa<sup>-1</sup>) are converted to mixing ratios (in pptv). The derivation of the mathematical expression for this conversion is detailed in Ziemke et al. (2001). The final step is to remove outliers (UT  $\text{NO}_2 > 200$  pptv) caused by steep slopes. A threshold of 200 pptv is used, as this far exceeds the maximum seasonal mean UT  $\text{NO}_2$  of 145 pptv in the OMI cloud-sliced UT  $\text{NO}_2$  product (Marais et al., 2018). We find though that only 3 cloud-sliced retrievals exceed 200 pptv. Seasonal means are obtained by Gaussian weighting individual estimates of cloud-sliced UT  $\text{NO}_2$  to the pressure centre (315 hPa). Gaussian weights are calculated as  $\exp(-(p - 315)^2 / (2 \times 135^2))$ , where  $p$  is the mean cloud top pressure of the gathered points used in the cloud-sliced UT  $\text{NO}_2$  retrieval, 315 hPa is the pressure centre, and 135 hPa the distance from the pressure centre to the edges.

**Deleted:** error on the slope

**Deleted:** Large local enhancements in

**Deleted:** at high altitudes

**Deleted:**

**Deleted:** that lead to negative slopes and negative cloud-sliced UT  $\text{NO}_2$

**Deleted:** and o

**Deleted:** (UT  $\text{NO}_2 > 200$  pptv) removed

The cloud-slicing retrieval adopted here is mostly similar to that applied to OMI to estimate mid-tropospheric  $\text{NO}_2$  at 900-650 hPa (Choi et al., 2014) and UT  $\text{NO}_2$  at 450-280 hPa (Marais et al., 2018). We extend the ceiling of the retrieval to 180 hPa ( $\sim 12.5$  km) to better capture the vertical extent of the upper troposphere. Another notable distinction is that the method applied to OMI used vertical gradients of  $\text{NO}_2$  from the NASA Global Modeling Initiative (GMI) CTM to diagnose scenes with non-uniform  $\text{NO}_2$ . to satisfy the assumption that  $\text{NO}_2$  is vertically uniform for conversion of regression slopes to mixing ratios (Ziemke et al., 2001; Choi et al., 2014). The threshold used for this is  $0.33$  pptv hPa<sup>-1</sup>. We dispense with this step, as its application to TROPOMI requires a model at a similar fine spatial resolution to TROPOMI and CTMs may underestimate vertical  $\text{NO}_2$  gradients in the UT (Boersma et al., 2011; Travis et al., 2016; Silvern et al., 2018). Anyway, we find that the

**Deleted:**

**Deleted:** using a

**Deleted:** of

205

210

215

220

225

strict filtering applied to GEOS-Chem partial columns removes most (85%) scenes with absolute NO<sub>2</sub> vertical gradients  $\geq 0.33$  pptv hPa<sup>-1</sup> for a target resolution of  $4^\circ \times 5^\circ$ .

Figure 1 shows GEOS-Chem seasonal mean cloud-sliced and “true” cloudy UT NO<sub>2</sub> at  $4^\circ \times 5^\circ$ . The latter is also Gaussian weighted to 315 hPa. The uncertainty in individual cloud-sliced values, estimated as the RMA regression slope error, range from 6% to the imposed error limit, 99%. This is reduced to <2% for the multiyear seasonal means in Figure 1 due to temporal averaging. Agreement between the cloud-sliced and “true” cloudy UT NO<sub>2</sub> is shown in the scatterplot in Figure 2. Successful cloud-sliced retrievals can exceed 35 for many grid squares, though these do not exhibit better agreement with the “truth” than the grid squares with fewer (<10) retrievals. The two datasets are spatially consistent ( $R = 0.64$ ) and exhibit similar variance (slope =  $1.1 \pm 0.1$ ). The cloud-sliced UT NO<sub>2</sub> has a small positive offset in background UT NO<sub>2</sub> (intercept =  $2.3 \pm 1.2$  pptv). On average, cloud-sliced UT NO<sub>2</sub> is 17% more than the “true” cloudy UT NO<sub>2</sub>, but this depends on the spatial resolution of the retrieved cloud-sliced product. Regression slopes increase from  $0.87 \pm 0.03$  for cloud-sliced UT NO<sub>2</sub> obtained at  $2^\circ \times 2.5^\circ$  to  $1.4 \pm 0.2$  at  $8^\circ \times 10^\circ$  and the cloud-sliced UT NO<sub>2</sub> is 4.1% less than the “true” cloudy UT NO<sub>2</sub> at  $2^\circ \times 2.5^\circ$  and 37% more at  $8^\circ \times 10^\circ$ . The increasingly positive bias with spatial resolution is because a greater relative proportion of clusters with NO<sub>2</sub> vertical gradients  $\geq 0.33$  pptv hPa<sup>-1</sup> are retained at coarser resolution. The percentage retained relative to all clusters with more than 10 data points and uniform overlying stratospheric NO<sub>2</sub> increases from 9% for  $2^\circ \times 2.5^\circ$  to 15% for  $4^\circ \times 5^\circ$  and 23% for  $8^\circ \times 10^\circ$ . Maps of synthetic cloud-sliced UT NO<sub>2</sub> at  $2^\circ \times 2.5^\circ$  and  $8^\circ \times 10^\circ$  are in Figure S1. Strict data filtering in the cloud-slicing steps removes 90% of the clusters of GEOS-Chem partial columns for the  $4^\circ \times 5^\circ$  product. Most (33%) data loss is due to the strict relative standard deviation threshold applied to stratospheric NO<sub>2</sub>. Cloud-slicing is very sensitive to this threshold. Relaxing it from a relative standard deviation of 0.02 to 0.03 increases data retention from 10% to 17%, but increases the positive bias in cloud-sliced UT NO<sub>2</sub> from 17% to 45%. This is due to an increase in the contribution of variability in the stratosphere to the cloud-slicing regression slopes.

Deleted: 8

Deleted: of the clusters of GEOS-Chem partial columns

Deleted: ,

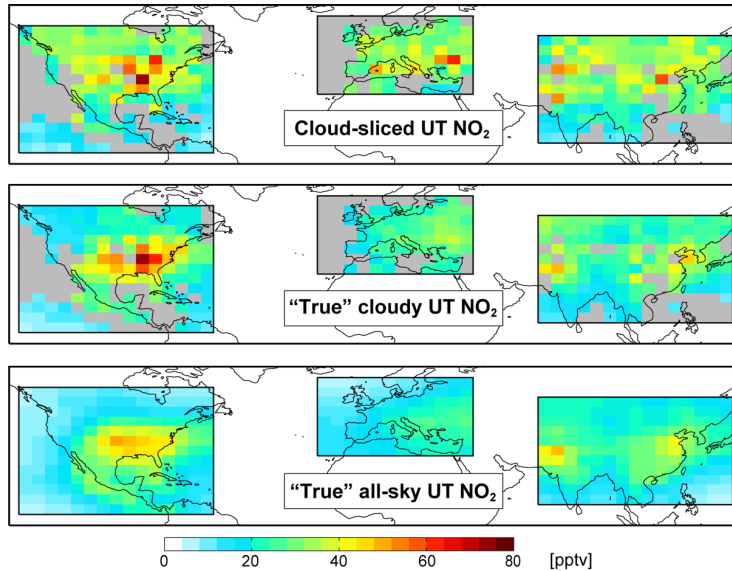

230 **Figure 1:** Comparison of synthetic cloud-sliced and “true” NO<sub>2</sub> in the upper troposphere (UT) for June-August 2016-2017. Maps show UT NO<sub>2</sub> at 4° × 5° from cloud-slicing GEOS-Chem partial columns above all clouds with cloud top pressures at 450-180 hPa (top), as grid-average mixing ratios from GEOS-Chem for the same scenes as are cloud-sliced (middle) and for all-sky (clear and cloudy) scenes (bottom). Data are Gaussian weighted to the pressure centre (315 hPa). Grey grids have <5 data points.

Also shown in Figure 1 is the “true” all-sky UT NO<sub>2</sub> obtained for all (cloudy and clear) scenes across 450-180 hPa. Model  
 235 grids with stratospheric influence are identified and removed using GEOS-FP tropopause heights that are updated hourly in the model. The “true” cloudy UT NO<sub>2</sub> is 17% more than all-sky UT NO<sub>2</sub>. Spatial resolution influences the size of this difference, increasing from 11% at 2° × 2.5° to 22% at 8° × 10°. This suggests that isolating cloudy scenes induces a 11-22% bias in seasonal mean NO<sub>2</sub> that could be due to a combination of poor data retention (low sampling frequency of cloudy scenes), the influence of clouds on NO<sub>x</sub> photochemistry (Pour-Biazar et al., 2007; Holmes et al., 2019), and local enhancements  
 240 in NO<sub>x</sub> from events like lightning and deep convective uplift of surface pollution that accompany clouds (Crawford et al., 2000; Ridley et al., 2004; Bertram et al., 2007).

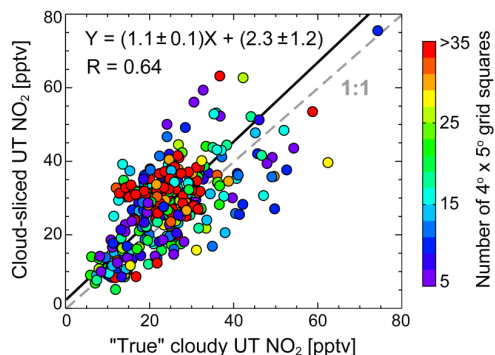

245 **Figure 2:** Scatter plot of synthetic cloud-sliced versus “true” cloudy NO<sub>2</sub> in the upper troposphere (UT). Points are 4° × 5° seasonal means from Figure 1 (top and middle panels) coloured by the number of successful cloud-sliced retrievals. Values inset are the RMA regression statistics and Pearson’s correlation coefficient (R). Slope and intercept errors are from bootstrap resampling.

Cloud-slicing applied to GEOS-Chem considers all cloudy scenes, whereas cloud-slicing of satellite observations is applied to partial columns above optically thick clouds, so that the clouds shield against contamination of NO<sub>2</sub> from below the cloud. If we only consider synthetic partial columns above clouds with a physical (geometric) cloud fraction across 450-180 hPa of at least 0.7, the cloud-sliced UT NO<sub>2</sub> positive difference is similar (18%) to that obtained for all cloudy scenes, but half the amount of data is retained. Cloud fractions retrieved with TROPOMI are effective or radiometric cloud fractions that are systematically more than the physical cloud fraction from the model (Bucsela et al., 2013; Laughner et al., 2018). Our results suggest that representation error is not sensitive to the cloud fraction threshold. Another distinction in GEOS-Chem and TROPOMI cloud variables is that the model provides the physical cloud top height, whereas TROPOMI cloud retrievals that use models that assume clouds are uniform reflective boundaries retrieve cloud top heights that can be ~1 km lower than the physical cloud top (Joiner et al., 2012; Choi et al., 2014; Loyola et al., 2018a). We again apply the cloud-slicing algorithm to the simulated partial columns, but with the altitude of the cloud top heights artificially lowered by 1 km. This approach assumes that the difference in altitudes of effective (radiometric) clouds and physical clouds is systematic and vertically and horizontally uniform. The difference between the resultant cloud-sliced UT NO<sub>2</sub> (top panel of Figure 1) and the “true” cloudy UT NO<sub>2</sub> (middle panel of Figure 1) increases from 17% to 24%. This is because a 1 km decrease in cloud top altitude leads to a larger relative increase in the column above high-altitude clouds than low-altitude clouds, leading to steeper regression slopes and larger UT NO<sub>2</sub>.

Deleted: to minimise

Deleted: The

Deleted: c

Deleted: from

Deleted: is an

Deleted: is

Deleted: less

Deleted: reduced

Deleted: shown in the

Deleted: the

Deleted: vertical extent of partial

Deleted: s

Deleted: those above



### 3 Evaluation of TROPOMI with ground-based instruments at high-altitude sites

Pandora spectrometer systems provide observations of total and [free](#) tropospheric columns of NO<sub>2</sub> using direct sun, direct moon and sky radiance observations (Herman et al., 2009; Cede et al., 2019). Those at high-altitude sites ([> 2 km or < 800 hPa](#)) have limited influence from the planetary boundary layer ([typically extending to 1-2 km altitude](#)) and so are used here to evaluate [TROPOMI NO<sub>2</sub> total columns of the free troposphere \(middle and upper troposphere\) and stratosphere](#). These include long-term Pandora instruments at Mauna Loa, Hawaii (19.48°N, 155.60°W, 4.2 km above sea level or a.s.l., ~600 hPa), Izaña, Tenerife, Canary Islands (28.31°N, 16.50°W, 2.4 km a.s.l., ~760 hPa), and Altzomoni, Mexico (19.12°N, 98.66°W, 4.0 km a.s.l., ~620 hPa). Mauna Loa and Izaña are remote and have limited anthropogenic influence (Toledano et al., 2018), whereas Altzomoni is ~70 km southeast of Mexico City and is often within the mixed layer of the city in the afternoon (Baumgardner et al., 2009) after the TROPOMI overpass. On average, multiyear mean tropospheric NO<sub>2</sub> columns from OMI are ~10 × 10<sup>15</sup> molecules cm<sup>-2</sup> lower over Altzomoni (<5 × 10<sup>15</sup> molecules cm<sup>-2</sup>) than the city (>15 × 10<sup>15</sup> molecules cm<sup>-2</sup>) (Rivera et al., 2013). At Izaña, there is also a MAX-DOAS instrument that we use to retrieve [free](#) tropospheric columns of NO<sub>2</sub> to assess [these from](#) Pandora and TROPOMI. MAX-DOAS offers vertical sensitivity in the troposphere and has been used extensively to determine free tropospheric concentrations of NO<sub>2</sub> at high-altitude sites (Gomez et al., 2014; Gil-Ojeda et al., 2015; Schreier et al., 2016). [There are also Pandora instruments at remote sites in the northern middle and high latitudes in Eureka, Canada and Ny-Ålesund, Norway, but the total columns of these sample the planetary boundary layer. The Eureka site is at 617 m altitude and the Ny-Ålesund site at 18 m.](#)

Pandora level 2 total and tropospheric columns are from the Pandonia Global Network (PGN) (<http://data.pandonia-global-network.org/>; last accessed 1 June 2020). We use version 1.7 “nv~~s~~1” retrieval of total columns and “nv~~h~~1” retrieval of tropospheric columns (described below). Observations are for a full year (1 June 2019 to 31 May 2020) at Izaña. The data record is shorter at Mauna Loa (ends 29 March 2020) and Altzomoni (ends 9 March 2020). Total slant columns (NO<sub>2</sub> abundances along the instrument viewing path) are retrieved by fitting a fourth order polynomial to spectra at 400-440 nm using an NO<sub>2</sub> effective temperature of 254.4 K. These are then converted to total vertical column densities by accounting for the geometry of the viewing path (Cede et al., 2019). The Pandora tropospheric NO<sub>2</sub> columns have not yet been validated against other observations. Retrieval of these involves simultaneous retrieval of slant columns of NO<sub>2</sub> and the O<sub>2</sub>-O<sub>2</sub> dimer at multiple elevation angles (typically 0°, 60°, 75°, 88°, and 89°). The O<sub>2</sub>-O<sub>2</sub> dimer slant columns are used to calculate a representative air mass factor (AMF) that is applied to the difference in NO<sub>2</sub> slant columns at multiple pointing elevation angles to calculate a tropospheric vertical column. The data also include estimates of the uncertainty on the total and tropospheric columns due to instrument noise and atmospheric variability (Cede et al., 2019). The NO<sub>2</sub> effective temperature used in the total NO<sub>2</sub> column retrieval is greater than the column average ambient temperature at high-altitude sites. This induces a positive bias in the total columns estimated by Verhoelst et al. (2021) to be ~10% that we address by [decreasing](#) the

Deleted: free tropospheric and stratospheric

Deleted: from TROPOMI

Deleted: h

Deleted: s

Deleted: downscaling

Pandora total columns and associated errors by 10%. No correction is applied to the tropospheric columns, due to variable contribution of the troposphere to the total column.

315

MAX-DOAS vertical tropospheric columns of NO<sub>2</sub> at Izaña are from RASAS-II sky radiance spectra for June 2019 to February 2020. The spectra are fitted for NO<sub>2</sub> and O<sub>2</sub>-O<sub>2</sub> in the wavelength range 425-490 nm and slant columns are calculated as the difference between these spectra at high-sun (90° instrument elevation angle) and multiple elevation angles (1°, 2°, 3°, 5°, 10°, 30°, and 70°) (Hönninger et al., 2004; Gil et al., 2008; Puentedura et al., 2012; Gomez et al., 2014; Gil-Ojeda et al., 2015).

320 Vertical columns are estimated using optimal estimation that solves an ill-constrained problem by introducing prior information (Rogers, 2000). Prior information for Izaña includes fixed (with altitude) aerosol extinction of 0.01 km<sup>-1</sup> and NO<sub>2</sub> of 20 pptv from the surface to the tropopause. Aerosol abundances at Izaña are sometimes influenced by windblown dust from the Sahara Desert, but are typically low (aerosol optical depth or AOD < 0.05) (Gomez et al., 2014; Gil-Ojeda et al., 2015). The prior NO<sub>2</sub> profile is within the range of background NO<sub>2</sub> in the UT (10-20 pptv) (Marais et al., 2018) and MAX-DOAS  
325 NO<sub>2</sub> concentrations previously retrieved at Izaña (20-40 pptv) (Gomez et al., 2014). Filtering is applied to remove vertical column retrievals with limited independent information (degrees of freedom for signal < 1), and significant light path attenuation by aerosols (AOD > 0.1) and clouds (effective cloud fraction > 0.5). AOD is derived with MAX-DOAS O<sub>2</sub>-O<sub>2</sub> dimer differential slant columns retrieved over the same wavelength range as NO<sub>2</sub> (Frieß et al., 2006) and cloud fraction is from the Fast Retrieval Scheme for Clouds from the Oxygen A band version S (FRESCO-S) product provided with the  
330 TROPOMI NO<sub>2</sub> product. Filtering removes 40% of the retrieved vertical tropospheric NO<sub>2</sub> columns at Izaña.

TROPOMI data [are](https://s5phub.copernicus.eu/dhus/) from the Sentinel-5P Pre-Operations Data Hub (<https://s5phub.copernicus.eu/dhus/>; last accessed 15 June 2020). We use a year of NO<sub>2</sub> data (1 June 2019 to 31 May 2020) from the level 2 offline (OFFL) product version 01-03-02. The data product includes NO<sub>2</sub> abundances along the optical path from the sun to the instrument (the total slant column or SCD<sub>tot</sub>), NO<sub>2</sub> vertical column densities in the stratosphere (VCD<sub>strat</sub>), and the stratospheric air mass factor (AMF<sub>strat</sub>). A detailed description of retrieval of SCD<sub>tot</sub> and VCD<sub>strat</sub> is described in the product Algorithm Theoretical Basis Document (van Geffen et al., 2019) and by van Geffen et al. (2020). In brief, SCD<sub>tot</sub> are obtained by spectral fitting of TROPOMI top-of-atmosphere radiances at 405-465 nm by accounting for light absorption by NO<sub>2</sub> and other relevant gases. VCD<sub>strat</sub> are from assimilation of TROPOMI and modelled total slant columns over locations diagnosed by the model to have limited tropospheric influence  
340 (predominantly remote oceans) (Boersma et al., 2004; Dirksen et al., 2011; van Geffen et al., 2019). The modelled slant columns are the product of vertical columns from the TM5-MP CTM (Williams et al., 2017) and AMFs calculated using TROPOMI viewing geometries and surface reflectivities. The CTM is simulated at 1° × 1° and driven with ECMWF meteorology updated every 3 hours. SCD<sub>tot</sub> are separated into a stratospheric (SCD<sub>strat</sub>) and tropospheric (SCD<sub>trop</sub>) component and a tropospheric AMF (AMF<sub>trop</sub>) is applied to SCD<sub>trop</sub> to obtain tropospheric vertical columns (VCD<sub>trop</sub>). AMF<sub>trop</sub> accounts  
345 for viewing geometry, surface reflectivity, atmospheric absorption and scattering of light by trace gases and aerosols, and sensitivity to the vertical distribution of NO<sub>2</sub>. A vertically resolved correction is also applied to the AMF<sub>trop</sub> to correct for the

Deleted: is

fixed NO<sub>2</sub> effective temperature (220 K) used to retrieve SCD<sub>tot</sub>. The light path in the UT is relatively unobstructed by aerosols and, for cloud-slicing, would mostly be impacted by treatment of the reflectivity of optically thick clouds. We choose to use an AMF that only accounts for viewing geometry (AMF<sub>trop,geo</sub>) due to uncertainties in the modelled vertical distribution of NO<sub>2</sub> in the UT (Stavrakou et al., 2013; Travis et al., 2016) and representation errors from a model at coarser resolution (~100 km) than TROPOMI (< 10 km at nadir). Choi et al. (2014) found that OMI partial NO<sub>2</sub> columns calculated with AMF<sub>trop,geo</sub> above optically thick clouds in the mid-troposphere (650 hPa) were at most 14% more than those calculated with a detailed AMF that assumed clouds are near-Lambertian surfaces with albedo of 0.8 and NO<sub>2</sub> is constant with altitude. The effect of not including a temperature correction will be small in the UT where temperatures are ~220 K anyway. To confirm this, we find that GEOS-Chem cloud-sliced UT NO<sub>2</sub> calculated with the TROPOMI AMF temperature correction expression in van Geffen et al. (2019) are only 6% less than those in Figures 1-2.

We calculate VCD<sub>trop</sub> by first obtaining SCD<sub>trop</sub> as the difference between SCD<sub>tot</sub> from the data product and SCD<sub>strat</sub> calculated as the product of the reported VCD<sub>strat</sub> and AMF<sub>strat</sub>:

$$SCD_{trop} = SCD_{tot} - (VCD_{strat} \times AMF_{strat}) \quad (1).$$

This we use to estimate the above-cloud VCD<sub>trop</sub> using AMF<sub>trop,geo</sub> that we calculate with the reported solar zenith angles (SZA) and viewing zenith angles (VZA):

$$VCD_{trop} = \frac{SCD_{trop}}{AMF_{trop,geo}} = \frac{SCD_{trop}}{(\sec(SZA) + \sec(VZA))} \quad (2).$$

The TROPOMI VCD<sub>tot</sub> we compare to Pandora are calculated as the sum of reported VCD<sub>strat</sub> and our calculated VCD<sub>trop</sub> (Equation (2)). Only data with quality flags (“qa\_value” in the data product) of at least 0.45 are used. This removes data affected by sun glint, poor precision in the retrieval and radiances, and SZA > 84.5° (van Geffen et al., 2019). Similarly, good quality Pandora retrievals of total and tropospheric columns are identified as those with data quality flags of 0, 1, 10, or 11 (Cede et al., 2019), consistent with Ialongo et al. (2020). Coincident satellite and ground-based data are identified as TROPOMI pixels within a 0.2° radius (~20 km) of the station and ground-based data ±30 min around the TROPOMI overpass.

The upper panel of Figure 3 compares collocated daily mean Pandora and TROPOMI total columns. This compares predominantly clear-sky observations from Pandora and all-sky observations from TROPOMI, as the larger sampling footprint of TROPOMI will include influence from clouds. TROPOMI cloud fractions from the FRESKO-S product coincident with Pandora range from cloud free (<0.1) to cloudy (0.8 for Mauna Loa and Izaña, 0.5 for Altimoni) and average 0.3 at Mauna Loa and Izaña and 0.2 at Altimoni. Errors on the daily means, obtained by adding in quadrature reported uncertainties of individual columns, are small at all sites. These vary from 0.1% to 19% for Pandora and 1.5% to 16% for TROPOMI. TROPOMI and Pandora total columns are temporally consistent (R = 0.69 at Mauna Loa, R = 0.87 at Izaña, R = 0.67 at Altimoni), but there is a systematic positive offset in TROPOMI (intercepts in Figure 3) ranging from 6.6 × 10<sup>14</sup> molecules

Deleted: d

cm<sup>-2</sup> at Mauna Loa to  $9.3 \times 10^{14}$  molecules cm<sup>-2</sup> at Altzomoni. TROPOMI is on average 18% higher than Pandora at Mauna  
 Loa, 26% at Izaña, and 38% at Altzomoni. Verhoelst et al. (2021) also report a positive bias in TROPOMI total columns at the  
 same Pandora sites of 6% at Mauna Loa, 19% at Izaña, and 28% at Altzomoni for April 2018 to February 2020. Our higher  
 values compared to Verhoelst et al. (2021) is because of the 10% downward adjustment we apply to Pandora total columns.  
 The difference in sampling footprints of space- and ground-based instruments can influence agreement between the two  
 (Pinardi et al., 2020). We find though that the difference between TROPOMI and Pandora at Mauna Loa and Izaña is relatively  
 insensitive to the choice of sampling coincidence. The difference is 17-20% at Mauna Loa and 25-26% at Izaña for a  
 TROPOMI sampling radius range of 0.05-0.3° and for a Pandora sampling time window range of ±15-60 min. The comparison  
 at Altzomoni though is very sensitive to the sampling radius due to proximity to Mexico City. There the difference increases  
 from 22% at 0.05° for 45 coincident points to 48% at 0.3° for 76 coincident points.

Deleted: and

Deleted: downscaling

Deleted: unchanged by

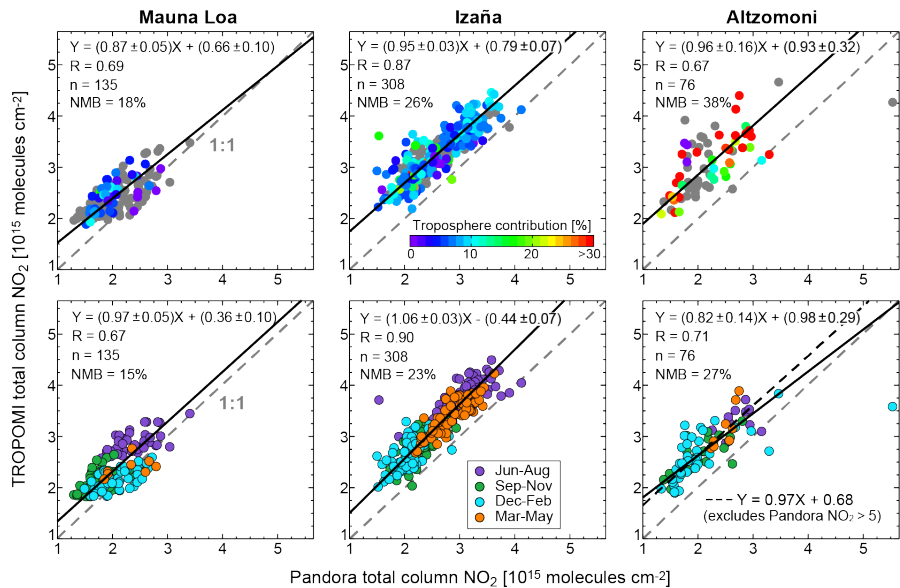

**Figure 3: Comparison of TROPOMI and Pandora total NO<sub>2</sub> columns at high-altitude sites located in the free troposphere (> 2 km altitude).** Points are daily means with at least 5 coincident observations at Mauna Loa (left), Izaña (centre), and Altzomoni (right) before (upper) and after (lower) applying correction factors to TROPOMI stratospheric and tropospheric columns (see text for details). Upper panel colours are the relative contribution of the free troposphere to the total column according to Pandora where available, grey otherwise. Data in the lower panel are coloured by season. Lines are the 1:1 relationship (grey dashed) and RMA regression (black solid). Values inset are Pearson's correlation coefficients, RMA regression statistics, number of data points (n),

and the TROPOMI normalized mean bias (NMB). Also shown for Altimoni (bottom right panel) is the RMA regression without the Pandora >  $5 \times 10^{15}$  molecules  $\text{cm}^{-2}$  [observation](#) (black dashed line). Axes do not start at the origin.

At Mauna Loa, the [free](#) tropospheric column contribution to the total averages 5.1% (range of 0.2-16%), according to Pandora. This is likely an overestimate, as few (33%) Pandora tropospheric daily means could be estimated, as indicated by the grey points in Figure 3. The contribution of the free troposphere to the total column at the other sites is 8.3% (0.2-38%) at Izaña and 31% (8-91%) at Altimoni. Due to the small contribution of the free troposphere to the total at Mauna Loa, we use the comparison of Pandora and TROPOMI at this site to evaluate the TROPOMI stratospheric column, as has been done previously (Verhoelst et al., 2021). At Mauna Loa, TROPOMI underestimates stratospheric  $\text{NO}_2$  variance by 13% (slope =  $0.87 \pm 0.05$ ). A regression slope less than unity suggests that higher resolution features are smoothed by the coarser spatial resolution of the TM5-TMP model ( $1^\circ \times 1^\circ$ ) and time resolution of the meteorology (3-hourly). The underestimate in stratospheric  $\text{NO}_2$  variance would lead to an overestimate in the relative contribution of the stratosphere to the total column for small column densities and vice versa. This would result in an overall overestimate in cloud-sliced UT  $\text{NO}_2$ , increasing with decline in UT  $\text{NO}_2$  values, as the relative overestimate in column densities will be greater for high-altitude clouds than for low-altitude clouds. The 18% higher TROPOMI than Pandora total columns at Mauna Loa is larger than and opposite in sign to the <10% ( $-2 \times 10^{14}$  molecules  $\text{cm}^{-2}$ ) meridional difference in TROPOMI stratospheric columns from the near-real time (NRTI)  $\text{NO}_2$  product and those obtained with twilight measurements from the near-global Système d'Analyse par Observation Zénitale (SAOZ) network of Zenith Scattered Light Differential Optical Absorption Spectroscopy (ZSL-DOAS) instruments (Lambert et al., 2019). The implied difference between SAOZ and Pandora stratospheric columns coincident with TROPOMI (Pandora < SAOZ) may be due to the need to account for time differences between the SAOZ measurements (twilight) and TROPOMI (midday) (Verhoelst et al., 2021). This difference warrants further investigation, as these ground-based measurements are crucial for validating space-based sensors that measure  $\text{NO}_2$ .

We apply a variance correction to TROPOMI stratospheric columns by dividing these by 0.87 (the slope of the TROPOMI versus Pandora total columns at Mauna Loa in Figure 3) and subtracting the resultant mean increase in TROPOMI stratospheric columns of  $3 \times 10^{14}$  molecules  $\text{cm}^{-2}$ . This reduces the intercepts in the top panel of Figure 3 to  $4.4 \times 10^{14}$  molecules  $\text{cm}^{-2}$  for Mauna Loa,  $7.9 \times 10^{14}$  molecules  $\text{cm}^{-2}$  for Izaña, and  $7.3 \times 10^{14}$  molecules  $\text{cm}^{-2}$  for Altimoni (not shown). Likely causes for the remaining discrepancy between TROPOMI and Pandora could be a positive offset in the TROPOMI radiance intensity that is estimated to be 5% of the total column or  $0.1-1 \times 10^{15}$  molecules  $\text{cm}^{-2}$  (van Geffen et al., 2020), challenges obtaining a Pandora reference measurement (atmospheric column without  $\text{NO}_2$ ) (Herman et al., 2009), and an overestimate in TROPOMI free tropospheric  $\text{NO}_2$ . The radiance intensity offset has been shown to mostly affect retrievals over open oceans (van Geffen et al., 2020), and an overestimate in free tropospheric  $\text{NO}_2$  would have a larger effect on the total column comparison at Izaña and Altimoni than at Mauna Loa.

Deleted: ,

Deleted:

Deleted: compared to

Deleted: We thus use

Deleted: total columns to identify that

Deleted: This is likely because the variability in stratospheric  $\text{NO}_2$  is smoothed by ...

Deleted: e impact on the cloud-sliced UT  $\text{NO}_2$  is

Deleted: steep regression slopes and

Deleted: n

Deleted: ,

Deleted: upper troposphere column density

Deleted: overestimated

Deleted: and underestimated

Deleted: The underestimate in TROPOMI stratospheric column variance may contribute to the general pattern in validation studies comparing TROPOMI and Pandora total columns that find TROPOMI is less than Pandora when  $\text{NO}_2$  is large and more than Pandora when  $\text{NO}_2$  is small for the global Pandora network (Pinardi et al., 2020; Verhoelst et al., 2021) and at individual Pandora sites. TROPOMI is less than Pandora (-24 to -28%) at a relatively polluted Greater Toronto Area site, but more than Pandora (8-11%) at a cleaner rural site north of the city (X. Zhao et al., 2020). Similarly, at a site in Helsinki, Finland, TROPOMI is less than Pandora (-28%) for Pandora >  $10 \times 10^{15}$  molecules  $\text{cm}^{-2}$  and more than Pandora (17%) for Pandora <  $10 \times 10^{15}$  molecules  $\text{cm}^{-2}$  (Ialongo et al., 2020). ¶

Deleted: After applying the stratospheric  $\text{NO}_2$  variance correction,

Deleted: decrease

Deleted: include

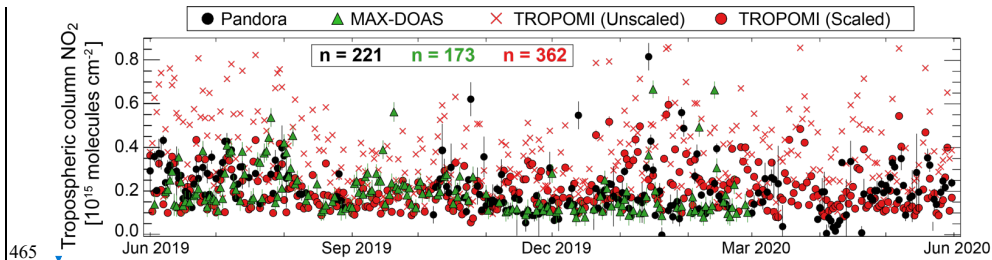

Figure 4: Time series of free tropospheric column densities of NO<sub>2</sub> at Izaña. Points are daily midday means from Pandora (black circles), MAX-DOAS (green triangles), and TROPOMI (red) before (crosses) and after (circles) applying scaling factors to the stratospheric and tropospheric columns (see text for details). Error bars are individual retrieval uncertainties added in quadrature. Values inset are the number of midday daily means from each instrument.

Figure 4 compares time series of free tropospheric column densities of NO<sub>2</sub> at Izaña from Pandora, MAX-DOAS and TROPOMI. As with the total columns, Pandora and MAX-DOAS are sampled 30 min around the satellite overpass and TROPOMI 0.2° around the site. We impose a modest threshold to only use TROPOMI tropospheric columns  $>4 \times 10^{13}$  molecules cm<sup>-2</sup> to mimic the detection limits of the instruments (Gomez et al., 2014) and mitigate the influence of TROPOMI data that would be susceptible to errors in distinguishing the stratosphere from the troposphere. This brings the lower-end TROPOMI values into better agreement with the ground-based values and has no effect on TROPOMI columns  $>2 \times 10^{14}$  molecules cm<sup>-2</sup>. On average, Pandora is 14% more than MAX-DOAS for coincident midday daily means and the temporal correlation is modest ( $R = 0.4$ ). Temporal inconsistencies between Pandora and MAX-DOAS are due to challenges retrieving tropospheric columns routinely close to instrument detection limits (Gomez et al., 2014), lack of dynamic variability in the retrieved columns, and differences in the sampling extent of the two instruments. The MAX-DOAS sampling footprint, for example, shifts by at least 4° in latitude between its most northerly extent in winter solstices to its most southerly extent in summer solstices (Robles-Gonzalez et al., 2016). Most MAX-DOAS and Pandora data are at  $1\text{--}4 \times 10^{14}$  molecules cm<sup>-2</sup>, whereas the range for TROPOMI calculated using Eq. (1) and (2) extends to  $\sim 8 \times 10^{14}$  molecules cm<sup>-2</sup>. The range is the same as the comparison of TROPOMI and shipborne MAX-DOAS tropospheric columns by P. Wang et al. (2020a). In that study, TROPOMI was on average  $4 \times 10^{14}$  molecules cm<sup>-2</sup> more than MAX-DOAS. In our comparison, TROPOMI free tropospheric columns (red crosses in Figure 4) are 77% more than Pandora and 84% more than MAX-DOAS. The overestimate is similar if the reported detailed tropospheric AMF is used instead of AMF<sub>trop,geo</sub> (Eq. (2)) to calculate TROPOMI tropospheric columns.

The stratospheric variance correction reduces the difference between TROPOMI and coincident ground-based measurements to 40% compared to Pandora and 47% compared to MAX-DOAS (not shown). This is due to an increase in the relative contribution of the stratosphere to total columns  $> 2 \times 10^{15}$  molecules cm<sup>-2</sup> following the stratospheric column variance correction. A 40–47% overestimate in free tropospheric columns would induce a systematic positive bias in cloud-sliced UT

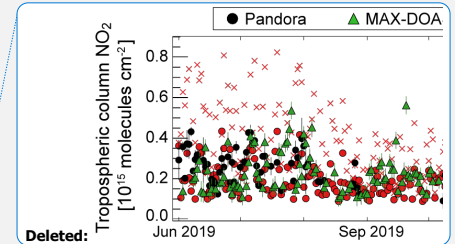

Deleted: sample

Deleted: 2

Deleted: and

Deleted: P. Wang et al. (2020a) obtained the

Deleted: same

Deleted: in tropospheric column densities

Deleted: from

Deleted: to

Deleted: measurements

Deleted: They found that

Deleted: A similar

Deleted: obtained

Deleted: the

510 [NO<sub>2</sub>](#). To address the remaining difference between TROPOMI [free](#) tropospheric columns and the ground-based observations, we [decrease](#) TROPOMI [free](#) tropospheric columns by 50% (red circles in Figure 4) leading to a difference of -4% with Pandora and 1% with MAX-DOAS. There is no temporal correlation between daily coincident observations of TROPOMI and the ground-based measurements ( $R < 0.1$ ), consistent with the comparison of TROPOMI to shipborne MAX-DOAS (P. Wang et al., 2020a).

The lower panel in Figure 3 compares Pandora to TROPOMI total columns after increasing TROPOMI stratospheric column variance by 13% and reducing TROPOMI [free](#) tropospheric columns by 50%. This correction reduces the difference between TROPOMI and Pandora by just 3 percentage points at Mauna Loa and Izaña and 11 percentage points at Altzomoni. The 515 variance at Altzomoni degrades from  $0.96 \pm 0.16$  to  $0.82 \pm 0.14$ , but this is because the relatively few coincident points (76 compared to 308 at Izaña) are influenced by the single Pandora observation  $> 5.5 \times 10^{15}$  molecules  $\text{cm}^{-2}$  (coincident corrected TROPOMI is  $< 4 \times 10^{15}$  molecules  $\text{cm}^{-2}$ ) that may be detecting NO<sub>2</sub> from fires [that typically occur in](#) December-February in the National Park where the instrument is located (Bravo et al., 2002; Baumgardner et al., 2009). The TROPOMI [free](#) tropospheric column contribution at Mauna Loa and Izaña is more consistent with that from Pandora after applying the stratospheric and [free](#) tropospheric column corrections, decreasing from 8% to 6% at Mauna Loa and 12% to 7% at Izaña. This 520 is not the case for Altzomoni (decrease from 14% to 9%), due to anthropogenic influence from Mexico City [that the coarser TROPOMI sampling footprint is not able to resolve](#). Points in Figure 3 are coloured by season to show that all sites experience a modest decline in NO<sub>2</sub> from summer (purple) to winter (cyan) due to the influence of solar variability on photochemical production of NO<sub>x</sub> in the stratosphere (Gil et al., 2008; Robles-Gonzalez et al., 2016) and seasonality in long-range transport and subsidence in the free troposphere (Gil-Ojeda et al., 2015). The distinct distribution of points in December-February 525 compared to June-August and September-November at Mauna Loa suggest there may be seasonality in the size of the discrepancy between TROPOMI and Pandora stratospheric columns. The remaining TROPOMI positive offset of  $\sim 4 \times 10^{14}$  molecules  $\text{cm}^{-2}$  is consistent with the  $2\text{--}4 \times 10^{14}$  molecules  $\text{cm}^{-2}$  positive offset in TROPOMI stratospheric columns reported by P. Wang et al. (2020a) from comparison to shipborne MAX-DOAS measurements. If the remaining offset is exclusively 530 due to the stratospheric column, this would cancel in the cloud-slicing retrieval for clusters of partial columns with uniform stratospheric NO<sub>2</sub>.

[In what follows, we use TROPOMI total columns with a 13% increase in stratospheric column variance and a 50% decrease in free tropospheric columns that are based on comparison to Pandora and MAX-DOAS.](#)

#### 535 4 Retrieval of TROPOMI NO<sub>2</sub> in the upper troposphere

[Seasonal mean UT NO<sub>2</sub> are obtained from TROPOMI for June 2019 to May 2020 at  \$1^\circ \times 1^\circ\$ .](#) The same cloud-slicing retrieval [and data filtering](#) steps applied to synthetic spectra from GEOS-Chem (Section 2) are applied to corrected TROPOMI total

Deleted:

Deleted: downscale

Deleted: by

Deleted: of

columns. The corrections include a 13% adjustment to the stratospheric column variance and 50% decrease in tropospheric columns based on comparison to the 3 high-altitude Pandora sites (Section 3). The degradation in resolution of TROPOMI nadir pixels from 5.6 km × 3.5 km to the target resolution (1° × 1°) is 400-fold compared to 250-fold for the synthetic experiment in Section 2 and a much greater (1300-fold) degradation in OMI nadir pixel resolution (13 km × 24 km) for the 5° × 8° product (Marais et al., 2018). The finer relative resolution we choose for TROPOMI cloud-sliced UT NO<sub>2</sub> compared to OMI is informed by the synthetic experiment applied to GEOS-Chem and the superior cloud-resolving capability of TROPOMI than OMI. Cloud-slicing is applied to partial columns above optically thick clouds, diagnosed with an effective cloud fraction ≥ 0.7, as in Marais et al. (2018), to limit contamination from light transmitted through clouds. Though the cloud-slicing retrieval steps applied to GEOS-Chem and TROPOMI are the same, there are differences in the modelled and retrieved cloud parameters that we discuss below.

Two TROPOMI cloud-sliced UT NO<sub>2</sub> products are derived using cloud top heights and cloud fractions from distinct cloud products. The first are FRESCO-S cloud fractions and cloud top pressures from the same data file as TROPOMI NO<sub>2</sub>. These are determined by minimizing the difference between measured and simulated spectra in the O<sub>2</sub> A-band (758-766 nm) using lookup tables and assuming clouds are single layer Lambertian reflectors with albedo of 0.8 (P. Wang et al., 2008; van Geffen et al., 2019). The second is the Optical Cloud Recognition Algorithm (OCRA) cloud fractions and Retrieval of Cloud Information using Neural Networks (ROCINN) cloud top heights. OCRA cloud fractions are retrieved by determining the difference, in colour space, between cloudy and clear reflectances (Loyola et al., 2007; Loyola et al., 2018a; Loyola et al., 2018b). ROCINN cloud top heights are retrieved in km by minimizing the difference between measured O<sub>2</sub> A-band radiances and neural network trained radiances modelled using OCRA cloud fractions (Loyola et al., 2007; Loyola et al., 2018b). In ROCINN, clouds are modelled as multiple optically uniform layers of light-scattering water droplets (the clouds-as-layers or CAL model). We convert the ROCINN-clouds-as-layers (ROCINN-CAL) cloud top heights to pressures for cloud-slicing and comparison to FRESCO-S. FRESCO-S data are quality screened using the same qa\_value threshold (0.45) as NO<sub>2</sub>. A qa\_value threshold of 0.5 is used for OCRA and ROCINN-CAL. Snow/ice scenes potentially misclassified as clouds by FRESCO-S are identified as differences in reported scene and surface pressures > 2%, as in van der A et al. (2020), as having snow cover > 80% or classified as permanent ice cover. In what follows, we distinguish the two cloud-sliced TROPOMI UT NO<sub>2</sub> products as FRESCO-S and ROCINN-CAL.

- Deleted:
- Deleted: to obtain seasonal mean UT NO<sub>2</sub> for a year (June 2019 to May 2020) at 1° × 1°
- Deleted: is
- Deleted: degrades
- Deleted: by
- Deleted: (
- Deleted: )
- Deleted: se are FRESCO-S from the same data file as TROPOMI NO<sub>2</sub> and the standalone offline (OFFL) cloud product.
- Deleted:
- Deleted: of relevant physical parameters
- Moved down [1]: The standalone product version number changes from 01-01-07 to 01-01-08 on 7 March 2020, but with no change to the data product (Argyrouli et al., 2019).
- Deleted: Cloud fractions are from the Optical Cloud Recognition [1]
- Deleted: ,
- Deleted: in blue (405-495 nm) and green (350-395 nm) broad ... [2]
- Deleted: C
- Deleted: (in km)
- Deleted: from the Retrieval of Cloud Information using Neural [3]
- Deleted: as input
- Deleted: and assuming
- Moved (insertion) [1]
- Deleted: The standalone product version number changes from 01-01-07 to 01-01-08 on 7 March 2020, but with no change to the data product (Argyrouli et al., 2019).
- Deleted: the
- Deleted: data
- Deleted: cloud fractions
- Deleted: cloud heights
- Deleted: This removes data affected by sun glint, spectral ... [5]
- Deleted: that could be
- Deleted: identified
- Deleted: in
- Deleted: the
- Deleted: product
- Deleted: scenes with
- Deleted: (
- Deleted: )
- Deleted: Snow and ice cover and classification are from the Neural Network [6]
- Deleted: UT NO<sub>2</sub>
- Deleted: UT NO<sub>2</sub>



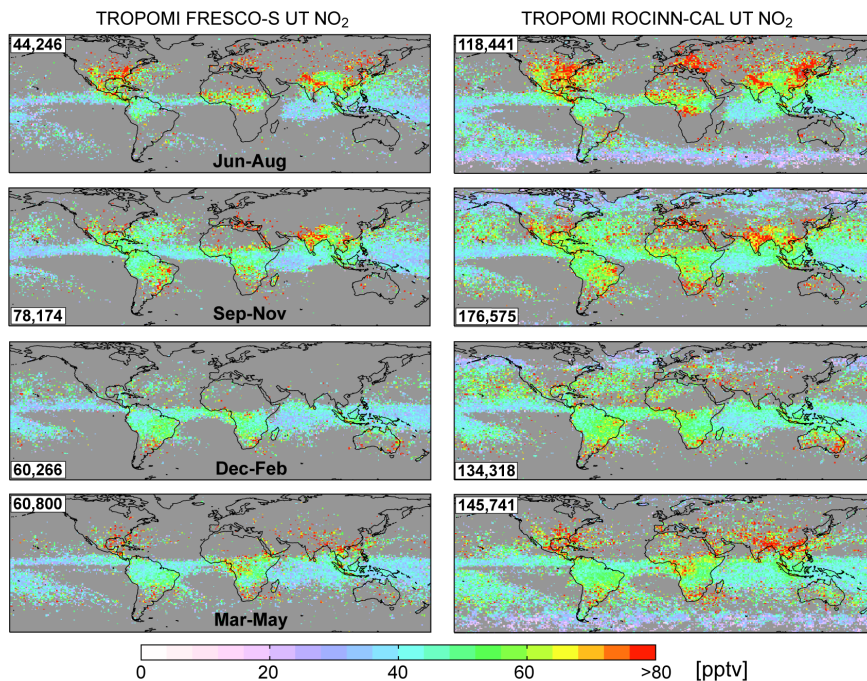

Figure 5: Seasonal mean upper tropospheric (UT) NO<sub>2</sub> from TROPOMI. Maps are UT NO<sub>2</sub> at 1° × 1° in June-August 2019 (first row), September-November 2019 (second), December 2019 to February 2020 (third), and March-May 2020 (fourth) using FRESKO-S (left) or ROCINN-CAL (right) cloud information and with corrections applied to TROPOMI stratospheric and tropospheric columns (see text for details). Inset numbers give total successful cloud-sliced retrievals. Grey grid squares have fewer than 5 cloud-sliced retrievals.

Figure 5 shows maps of seasonal mean FRESKO-S and ROCINN-CAL UT NO<sub>2</sub> at 1° × 1°. The spatial features are consistent with a combination of the density of lightning flashes (Cecil et al., 2014) and lightning properties such as flash footprint, duration, and energy (Beirle et al., 2014). These include elevated concentrations (> 80 pptv) over northern hemisphere land masses in June-August, the year-round 40-60 pptv band over tropical landmasses that shifts meridionally with the Intertropical Convergence Zone (ITCZ), and relatively low concentrations (< 30 pptv) over the remote Pacific Ocean. [We find reasonable spatial correlation \(R = 0.4-0.6\) between seasonal mean TROPOMI UT NO<sub>2</sub> and lightning flash densities from the Lightning Imaging Sensor-Optical Transient Detector \(LIS-OTD\) in all seasons, except September-November for FRESKO-S \(R = 0.34\). Seasonal LIS-OTD lightning flash densities at 1° × 1° are calculated from version 2.3 of the monthly climatology \(<https://ghrc.nsstc.nasa.gov/opendap/lis/climatology/LIS-OTD/HRMC/data/nc/contents.html>; last accessed 31 December](#)

2020). RMA slopes from regressing TROPOMI UT NO<sub>2</sub> against LIS-OTD lightning flash densities range from 0.3 to 0.6 pptv (10<sup>6</sup> flashes km<sup>-2</sup> min<sup>-1</sup>)<sup>-1</sup>, and UT NO<sub>2</sub> in the absence of lightning flashes in the tropics and subtropics (RMA intercepts) is very similar, 37-41 pptv, for both products in all seasons. In the cold polar regions in Figure 5 UT NO<sub>2</sub>, limited to ROCINN-CAL, are near background (<30 pptv) as NO<sub>2</sub> is preferentially present as NO<sub>x</sub> reservoir compounds such as peroxyacetyl nitrates (PANs) (Bottenheim et al., 1986). Large enhancements (NO<sub>2</sub> > 80 pptv) over northern China and the northeast US in June-August, and Australia in December-February most prevalent in the ROCINN-CAL product likely reflect contamination from surface pollution below clouds. These result from intense anthropogenic activity in North China and the northeast US (Zhao et al., 2013; Jiang et al., 2018; Z. Wang et al., 2020b) and routine pyrocumulonimbus injection of fire plumes into the free troposphere and lower stratosphere during the extreme 2019-2020 fire season in Australia (Kablick III et al., 2020).

FRESKO-S and ROCINN-CAL UT NO<sub>2</sub> are spatially consistent for coincident gridsquares (R of 0.82 to 0.88), though ROCINN-CAL UT NO<sub>2</sub> are 4.2-9.1 pptv more than FRESKO-S UT NO<sub>2</sub>. As with the synthetic experiment, UT NO<sub>2</sub> increases with degradation in resolution due to the relative increase in tropospheric columns with steep vertical gradients in NO<sub>2</sub>. Depending on the season, cloud-sliced UT NO<sub>2</sub> are 2-4% more at 2° × 2.5° and 3-9% more at 4° × 5° than at 1° × 1°. Good quality retrievals and optically thick clouds with cloud top pressures at 450-180 hPa account for ~2% of TROPOMI pixels using FRESKO-S and ~3% using ROCINN-CAL. Of these, 44,000-78,000 cloud-slicing retrievals are retained in each season for FRESKO-S, and 118,000-177,000 for ROCINN-CAL (Figure 5). Most data loss in the cloud-slicing retrieval is because of too few points (clusters < 10) or cloud top pressure range < 140 hPa. Discarded extreme values of cloud-sliced NO<sub>2</sub> > 200 pptv are only 0.1-0.5% of retained data. More cloud-sliced retrievals with ROCINN-CAL is due to greater abundance of optically thick clouds and clusters with greater cloud height range.

Figure 6 compares the meridional abundance of optically thick clouds in the UT from the two cloud products for June-August and December-February. The same information for the other two seasons is in Figure S2. Both products retrieve effective (radiometric) cloud fractions. These are systematically more than the physical (geometric) cloud fractions from GEOS-Chem, though the two converge for optically thick clouds with physical cloud fractions approaching 1 (Stammes et al., 2008; Laughner et al., 2018). The number of OCRA optically thick clouds is always more (often double) than that of FRESKO-S in all seasons and across all latitudes. The greatest difference in the number of optically thick clouds tracks the ITCZ and is also typically at 45°N/S. The majority (61-62%) of OCRA cloud fractions exceed 0.975 compared to 42-45% for FRESKO-S. Loyola et al. (2018a) determined that OCRA cloud fractions retrieved over oceans are 0.1 unit more than those from retrievals like FRESKO-S that assume fixed cloud albedo. Differences over land are not as systematic and vary from negligible in the tropics and subtropics to > 0.1 unit more in the Arctic (Loyola et al., 2018a). ROCINN-CAL retrieves cloud optical thicknesses alongside cloud heights. These exceed 20 for most (84-93%) 1° × 1° gridsquares used to cloud-slice TROPOMI, confirming that a cloud fraction threshold of 0.7 is sufficient to isolate optically thick clouds. The number of pixels in each cloud fraction threshold in Figure 6 suggests that a stricter cloud fraction threshold of 1.0 applied to the ROCINN-CAL product might lead

Deleted: -

Deleted: ;

Deleted: would

Deleted: intense

Deleted: Coincident gridsquares of the

Deleted: two data sets

Deleted: less

Deleted: The OCRA algorithm ordinarily includes red band reflectances, but TROPOMI OCRA relies on initial cloud-free reflectances from OMI that excludes the red part of the visible spectrum, though its absence only induces a small negative cloud fraction bias of ~0.03 (Loyola et al., 2018a).

to a more consistent spatial distribution of UT NO<sub>2</sub> to that from FRESKO-S in Figure 5. The resultant ROCINN-CAL UT NO<sub>2</sub> using a cloud fraction threshold of 1.0 in Figure S3. Half the number of cloud-sliced retrievals are obtained, as expected, and there are fewer retrievals over northern hemisphere high latitudes than in Figure 5. Those over the [Southern Ocean](#) in austral autumn and winter persist and may reflect enhanced occurrence of high-altitude clouds in these seasons over Antarctica (Verlinden et al., 2011). The average difference between ROCINN-CAL and FRESKO-S decreases from 5-8% for the same cloud fraction threshold of 0.7 to 0.2-1.6% using a cloud fraction threshold of 1.0 for ROCINN-CAL and 0.7 for FRESKO-S, likely due to reduced contamination of NO<sub>2</sub> from below clouds with the stricter cloud fraction threshold.

Deleted: southern ocean

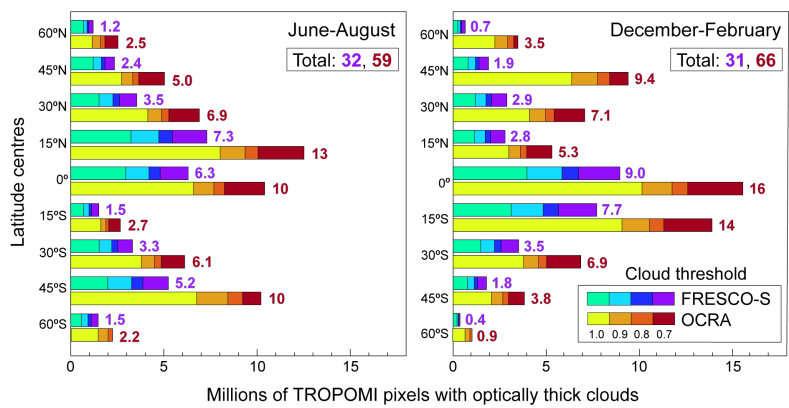

**Figure 6: Meridional distribution of FRESKO-S and OCRA optically thick clouds in the upper troposphere.** Bars count the occurrence of native TROPOMI pixels with cloud fractions  $\geq 1.0$ , 0.9, 0.8, and 0.7 binned into 15° latitude bands in June-August (left) and December-February (right) for FRESKO-S (cool colours) where FRESKO-S cloud top pressures are at 450-180 hPa, and OCRA (warm colours) where ROCINN-CAL cloud top pressures are at 450-180 hPa. Values inset are latitude band and global totals of TROPOMI pixels with cloud fraction  $\geq 0.7$ .

Deleted: number

Figure 7 compares gridded cloud product cloud top pressures for June-August sampled where FRESKO-S cloud top pressures are at 450-180 hPa and cloud fractions are at least 0.7. Cloud top pressures are spatially consistent in the tropics ( $R = 0.62$  at 0-35°N,  $R = 0.85$  at 0-35°N) and midlatitudes ( $R = 0.58$  at 35-70°N,  $R = 0.63$  at 35-70°S), but degrade north of 70°N ( $R = 0.31$ ). Variability in cloud top pressures is similar for the two products in the tropics (regional mean standard deviation of 28-33 hPa at 0-35°N and 30-31 hPa at 0-35°S), but deviates in the subtropics and midlatitudes (18 hPa for FRESKO-S, 24-30 hPa for ROCINN-CAL) and more so in the Arctic (13 hPa for FRESKO-S, 54 hPa for ROCINN-CAL). There is no coincident data south of 70°S in June-August. In December-February (Figure S4) south of 70°S there is a similarly weak correlation ( $R < 0.1$ ) and large difference in variability (19 hPa for FRESKO-S, 80 hPa for ROCINN-CAL). FRESKO-S does not account for scattering within and below clouds and so estimates the height as the optical centroid of the cloud (Joiner et al., 2012). The

Deleted: (Figure S4)

optical centroid is systematically lower in altitude (higher in pressure) than the physical cloud top, though FRESKO-S appears to be more consistent with ground-based observations than ROCINN-CAL for high-altitude cloud top heights (Compernelle et al., 2020). Loyola et al. (2018a) determined that cloud top altitudes from ROCINN-CAL were ~1 km (range: 0.6 km to >2 km) higher than those from a FRESKO-S type approach that assumes clouds are single layers with fixed albedo. Our test of the effect of an artificial decrease in cloud top altitude of 1 km for cloud-slicing synthetic GEOS-Chem partial columns (Section 2) suggests that 1 km lower altitude cloud tops in FRESKO-S should lead to larger UT NO<sub>2</sub> than those from ROCINN-CAL, but the opposite is observed (Figure 5). This suggests that the effect of other differences between the cloud products on the cloud-sliced UT NO<sub>2</sub> must dominate. Regression slopes in Figure 7 are less than unity, indicating that the difference in cloud top pressures between the two products decreases with pressure (increases with altitude). The implication for cloud-sliced UT NO<sub>2</sub> is greater global coverage with ROCINN-CAL, as clusters of TROPOMI pixels [using ROCINN-CAL cloud top pressures](#) in the midlatitudes and polar regions overcome the 140 hPa cloud top pressure range threshold imposed in the cloud-slicing algorithm. In the tropics and subtropics, ROCINN-CAL has less cloud top pressure range than FRESKO-S for the same scenes. This leads to steeper cloud-slicing regression slopes for ROCINN-CAL and [contributes to the 4-9 pptv greater UT NO<sub>2</sub> than FRESKO-S in Figure 5.](#)

**Deleted:** explains

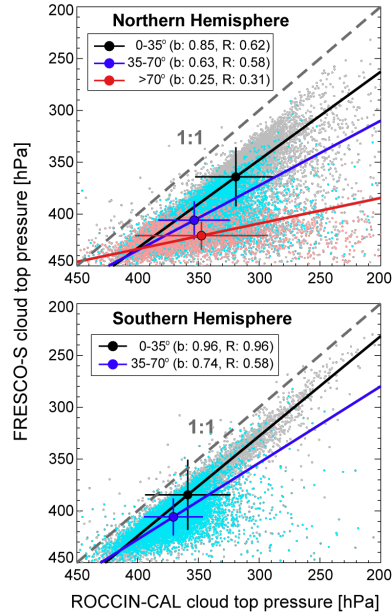

Figure 7: Comparison of FRESCO-S and ROCINN-CAL cloud top pressures from optically thick clouds in the upper troposphere for June-August 2019. Data are gridded to  $1^\circ \times 1^\circ$  for TROPOMI pixels with FRESCO-S cloud fractions  $\geq 0.7$  and cloud top pressures at 450-180 hPa. Small points are gridded seasonal means and lines are RMA regressions for the tropics (grey points, black regression line), subtropics and midlatitudes (cyan, blue), and the Arctic (pink, red). Large points are latitude band means and error bars are corresponding standard deviations. Grey dashed lines show the 1:1 relationship. Values in the legend are RMA regression slopes (b) and Pearson's correlation coefficients (R).

## 5 Comparison of TROPOMI and OMI UT NO<sub>2</sub>

We evaluate TROPOMI UT NO<sub>2</sub> with multiyear (2005-2007) seasonal mean cloud-sliced UT NO<sub>2</sub> from OMI at  $5^\circ \times 8^\circ$  (Marais et al., 2018). [OMI data are for 2005-2007, as this predates the substantial data loss caused by the row anomaly](#) (Schenkeveld et al., 2017; Torres et al., 2018). The OMI product is retrieved in a similar manner to TROPOMI, except that the GMI CTM is used to diagnose and remove steep gradients in NO<sub>2</sub> ( $\geq 0.33$  pptv hPa<sup>-1</sup>) and the OMI retrieval ceiling is lower (280 hPa, ~10 km) than TROPOMI (180 hPa, ~12.5 km). In regions where lightning is prevalent, the vertical distribution of NO<sub>2</sub> increases with altitude by 10-50 pptv across 280-180 hPa, as is observed with vertical profiles of NO<sub>2</sub> from spring-summer research aircraft campaign measurements over the US (Boersma et al., 2011; Silvern et al., 2018). Strict filtering applied to cloud-slicing removes most scenes where the increase in NO<sub>2</sub> with altitude exceeds 33 pptv across 280-180 hPa, based on the

synthetic experiment with GEOS-Chem. The influence of more than a 10-year gap between the OMI and TROPOMI UT NO<sub>2</sub> datasets on the comparison is challenging to quantify, due to paucity of routine measurements of NO<sub>2</sub> in the UT. The contribution of changes in lightning activity should be small, as interannual variability is small (<5%) and there is no discernible trend in the long-term record of satellite observations of lightning flashes (Schumann and Huntrieser, 2007). According to most climate models, there is an increase in lightning flashes due to global warming (Romps et al., 2014; Finney et al., 2016), though almost all of these models use the same positive relationship between lightning flashes and cloud-top-heights first proposed by Price and Rind (1992). The few models that consider lightning flash dependence on upward mass flux predict a decline in lightning flashes (Finney et al., 2014; Finney et al., 2018).

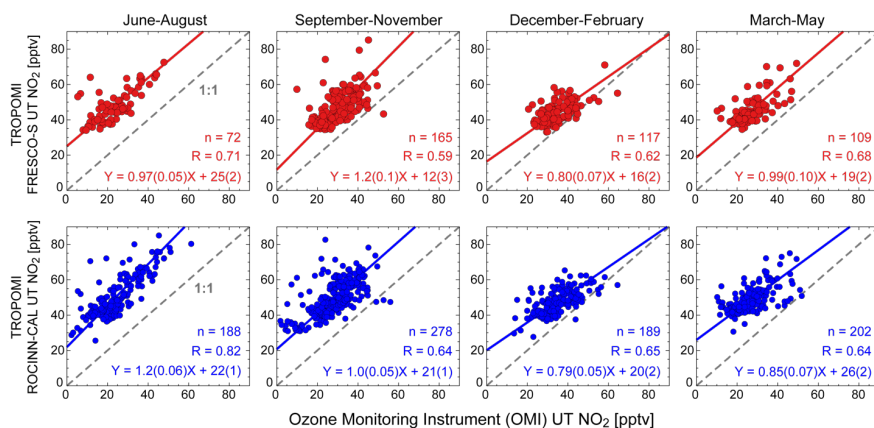

**Figure 8: Comparison of TROPOMI and OMI cloud-sliced UT NO<sub>2</sub>.** Points are seasonal means in June 2019 to May 2020 for TROPOMI and January 2005 to December 2007 for OMI gridded to the same 5° × 8° (latitude × longitude) grid for FRESCO-S vs OMI (upper panel, red) and ROCINN-CAL vs OMI (lower panel, blue). Values give the number of points, Pearson's correlation coefficients (R), RMA regression coefficients, and, in parentheses, bootstrap resampling slope and intercept errors.

Figure 8 evaluates spatial consistency between TROPOMI and OMI seasonal mean UT NO<sub>2</sub> on the OMI grid (5° × 8°) for TROPOMI cloud-sliced UT NO<sub>2</sub> 1° × 1° gridsquares with at least 10 cloud-sliced retrievals. TROPOMI is spatially consistent with OMI in all seasons for both products (R = 0.6-0.8). The TROPOMI background is 12-25 pptv more than OMI for FRESCO-S and 20-26 pptv more than OMI for ROCINN-CAL, based on the intercepts in Figure 8. This may be due to the observed increase in NO<sub>2</sub> with altitude across the sampling pressure ceilings of the two products (280 hPa for OMI, 180 hPa for TROPOMI), but other differences between the products may contribute. The OMI UT NO<sub>2</sub> product uses cloud information derived from OMI O<sub>2</sub>-O<sub>2</sub> slant columns. The signal from the O<sub>2</sub>-O<sub>2</sub> dimer declines with altitude, increasing uncertainty in the retrieval with altitude (Veeffkind et al., 2016). High-altitude clouds from OMI would have to be higher in altitude than

TROPOMI to contribute to the positive offset in TROPOMI UT NO<sub>2</sub> in Figure 8, based on results from the synthetic test of lowering GEOS-Chem cloud top heights by 1 km. The direction of the bias in OMI high-altitude cloud top heights compared to lidar-radar measurements also does not appear to be systematic (Veefkind et al., 2016). The retrieval approaches of the TROPOMI (DOAS) and OMI (NASA Standard Product or SP) slant columns are also distinct. DOAS retrieved NO<sub>2</sub> column densities are typically greater than those from NASA SP (Hains et al., 2010; Dirksen et al., 2011). The regression slopes in Figure 8 are closest to unity for June-August and March-May for FRESKO-S and September-November for ROCINN-CAL. The weaker variance in December-February in both TROPOMI products compared to OMI could reflect the need to account for seasonality in the stratospheric variance correction, but also could be because we derive a stratospheric variance correction for a single site. The discrepancy between OMI and TROPOMI UT NO<sub>2</sub> is much greater than in Figure 8 if no correction factors are applied to TROPOMI (Figure S5). TROPOMI UT NO<sub>2</sub> background concentrations (intercepts from RMA regression of TROPOMI versus OMI) are 16-35 pptv more than OMI for FRESKO-S and 27-36 pptv more for ROCINN-CAL and slopes exceed unity in all seasons (1.3-1.7 for FRESKO-S, 1.2-1.5 for ROCINN-CAL).

Deleted: But t

Deleted:

Deleted: underestimate in

Deleted:

Deleted: obtained

Deleted: without

Deleted: applying

Deleted: to

Deleted: stratospheric and tropospheric columns

Deleted: results in greater data density due to less variance in TROPOMI stratospheric columns, but the discrepancy with OMI is much greater

Deleted: lead

## 6 Conclusions

We have developed new products of NO<sub>2</sub> in the upper troposphere (UT; ~8-12 km) by cloud-slicing partial columns of NO<sub>2</sub> from the space-based TROPOMI instrument. This involves regressing partial NO<sub>2</sub> columns against cloud top pressures and converting regression slopes to UT NO<sub>2</sub> mixing ratios.

We first refined and tested representativeness of cloud-sliced UT NO<sub>2</sub> by applying cloud-slicing to synthetic partial columns from the GEOS-Chem model. Synthetic cloud-sliced UT NO<sub>2</sub> are spatially consistent (R = 0.64) with the synthetic truth, but preferentially sampling cloudy scenes, and substantial data loss contribute to a resolution-dependent positive bias in cloud-sliced UT NO<sub>2</sub> of 11-22%.

Before applying cloud-slicing to TROPOMI, we evaluated TROPOMI with Pandora total columns at high-altitude sites (Mauna Loa, Izaña, Altzomoni) and Pandora and MAX-DOAS free tropospheric columns at Izaña. We identified discrepancies between TROPOMI and ground-based NO<sub>2</sub> measurements that include a 13% underestimate in TROPOMI stratospheric NO<sub>2</sub> variance and 50% overestimate in TROPOMI tropospheric columns that would lead to an overestimate in cloud-sliced UT NO<sub>2</sub>.

We retrieved UT NO<sub>2</sub> from TROPOMI by applying the refined cloud-slicing algorithm to corrected TROPOMI partial columns above optically thick clouds with cloud top heights at 450-180 hPa using two alternate cloud products, FRESKO-S and ROCINN-CAL. ROCINN-CAL UT NO<sub>2</sub> has more extensive coverage (0°-70° N/S) than FRESKO-S (0°-45° N/S) due to its greater abundance of optically thick clouds. Coincident UT NO<sub>2</sub> from the two products exhibit similar spatial distribution, but

background UT NO<sub>2</sub> from ROCINN-CAL is 4-9 pptv more than FRESCO-S. This is due to [greater contamination from NO<sub>2</sub> below the cloud in ROCINN-CAL](#), but also steeper cloud-slicing regression slopes for ROCINN-CAL, as cloud top heights between the two products deviate with increasing cloud top pressure. Ongoing validation studies are needed to resolve these differences.

Both products are spatially correlated with the existing coarse resolution (5° latitude × 8° longitude) Ozone Monitoring Instrument (OMI) product, except that TROPOMI is 16-36 pptv more than OMI that we reason is due to the widely documented increase in NO<sub>2</sub> with altitude from the OMI pressure ceiling (280 hPa) to that for TROPOMI (180 hPa) [and differences in NO<sub>2</sub> column density retrievals](#).

TROPOMI UT NO<sub>2</sub> products presented here have the potential to provide routine, extensive and consistent measurements of NO<sub>x</sub> in the UT and, as TROPOMI observations accumulate, aid in characterising interannual and long-term variability in NO<sub>x</sub> in the under sampled UT.

**Code Availability**

Python code used to process TROPOMI data is available at <https://doi.org/10.5281/zenodo.4058442>.

**Data Availability**

Data can be requested from EAM for TROPOMI UT NO<sub>2</sub>, SC for OMI UT NO<sub>2</sub>, MN-C for MAX-DOAS slant columns, and RR for MAX-DOAS vertical columns.

**Author Contributions**

EAM led the analysis and writing, simulated GEOS-Chem, and cloud-sliced TROPOMI UT NO<sub>2</sub> and GEOS-Chem. JFR refined and documented python processing code. RGR retrieved MAX-DOAS vertical tropospheric columns. HE and FB provided guidance on best use and evaluation of TROPOMI NO<sub>2</sub>. SC and JJ retrieved OMI UT NO<sub>2</sub> and provided guidance on cloud-slicing. NA and AR are Pandora site PIs, and AC is PI of PGN. MNC maintains the RASAS-II instrument and retrieved the MAX-DOAS slant columns at Izaña. LG conducted MAX-DOAS geospatial sampling sensitivity tests for Izaña.

**Competing Interests**

The authors declare that they have no conflict of interest.

**Deleted:** , but  
**Deleted:** signal saturation of TROPOMI pixels leading to blooming over bright high-altitude clouds could also contribute

**Deleted:** Python code used to process TROPOMI data is available at <https://doi.org/10.5281/zenodo.4058442>.



## Acknowledgements

The project received funding from the European Research Council under the European Union's Horizon 2020 research and innovation programme (through a Starting Grant awarded to EAM, grant number 851854\_UPTROP). The authors are grateful to Piet Stammes and colleagues for retrieval of the FRESKO-S cloud product and Diego Loyola and colleagues for retrieval of the OCRA and ROCINN-CAL cloud product. The PGN is a bilateral project supported with funding from NASA and ESA. The Pandora measurements in Altzomoni were possible thanks to financial support of Conacyt-AEM (Grant No. 275239) and technical assistance from Alejandro Bezanilla. RR acknowledges funding from the Australian Research Council Centre of Excellence for Climate Extremes and the Dr Albert Shimmins Memorial Fund through the University of Melbourne.

## References

- Allen, D., Pickering, K., Duncan, B., and Damon, M.: Impact of lightning NO emissions on North American photochemistry as determined using the Global Modeling Initiative (GMI) model, *J. Geophys. Res.-Atmos.*, 115, 1-24, doi:10.1029/2010jd014062, 2010.
- Amedro, D., Bunkan, A. J. C., Berasategui, M., and Crowley, J. N.: Kinetics of the OH + NO<sub>2</sub> reaction: rate coefficients (217-333 K, 16-1200 mbar) and fall-off parameters for N<sub>2</sub> and O<sub>2</sub> bath gases, *Atmos. Chem. Phys.*, 19, 10643-10657, doi:10.5194/acp-19-10643-2019, 2019.
- Argyrouli, A., Snee, M., and Lambert, J.-C.: S5P Mission Performance Centre CLOUD [L2\_\_CLOUD\_] Readme, <https://sentinel.esa.int/documents/247904/3541451/Sentinel-5P-Cloud-Level-2-Product-Readme-File> (Last accessed: 20 January 2020), 2019.
- Baumgardner, D., Grutter, M., Allan, J., Ochoa, C., Rappenglueck, B., Russell, L. M., and Arnott, P.: Physical and chemical properties of the regional mixed layer of Mexico's Megapolis, *Atmos. Chem. Phys.*, 9, 5711-5727, doi:10.5194/acp-9-5711-2009, 2009.
- Beirle, S., Koshak, W., Blakeslee, R., and Wagner, T.: Global patterns of lightning properties derived by OTD and LIS, *Nat. Hazard Earth Sys.*, 14, 2715-2726, doi:10.5194/nhess-14-2715-2014, 2014.
- Belmonte-Rivas, M. B., Veefkind, P., Eskes, H., and Levelt, P.: OMI tropospheric NO<sub>2</sub> profiles from cloud slicing: constraints on surface emissions, convective transport and lightning NO<sub>x</sub>, *Atmos. Chem. Phys.*, 15, 13519-13553, doi:10.5194/acp-15-13519-2015, 2015.
- Bertram, T. H., Perring, A. E., Wooldridge, P. J., Crounse, J. D., Kwan, A. J., Wennberg, P. O., Scheuer, E., Dibb, J., Avery, M., Sachse, G., Vay, S. A., Crawford, J. H., McNaughton, C. S., Clarke, A., Pickering, K. E., Fuelberg, H., Huey, G., Blake, D. R., Singh, H. B., Hall, S. R., Shetter, R. E., Fried, A., Heikes, B. G., and Cohen, R. C.: Direct measurements of the convective recycling of the upper troposphere, *Science*, 315, 816-820, doi:10.1126/science.1134548, 2007.
- Boersma, K. F., Eskes, H. J., and Brinksma, E. J.: Error analysis for tropospheric NO<sub>2</sub> retrieval from space, *J. Geophys. Res.-Atmos.*, 109, 1-26, doi:10.1029/2003jd003962, 2004.

880 Boersma, K. F., Eskes, H. J., Dirksen, R. J., van der A, R. J., Veefkind, J. P., Stammes, P., Huijnen, V., Kleipool, Q.  
L., Sneep, M., Claas, J., Leitao, J., Richter, A., Zhou, Y., and Brunner, D.: An improved tropospheric NO<sub>2</sub> column retrieval  
algorithm for the Ozone Monitoring Instrument, *Atmos. Meas. Tech.*, 4, 1905-1928, doi:10.5194/amt-4-1905-2011, 2011.

Bottenheim, J. W., Gallant, A. G., and Brice, K. A.: Measurements of NO<sub>y</sub> species and O<sub>3</sub> at 82°N latitude, *Geophys.*  
*Res. Lett.*, 13, 113-116, doi:10.1029/GL013i002p00113, 1986.

885 Bradshaw, J., Davis, D., Grodzinsky, G., Smyth, S., Newell, R., Sandholm, S., and Liu, S.: Observed distributions of  
nitrogen oxides in the remote free troposphere from the NASA global tropospheric experiment programs, *Rev. Geophys.*, 38,  
61-116, doi:10.1029/1999rg900015, 2000.

Bravo, A. H., Sosa, E. R., Sánchez, A. P., Jaimes, P. M., and Saavedra, R. M. I.: Impact of wildfires on the air quality  
of Mexico City, 1992–1999, *Environ. Pollut.*, 117, 243-253, doi:10.1016/S0269-7491(01)00277-9, 2002.

890 Brogniez, C., Bazureau, A., Lenoble, J., and Chu, W. P.: Stratospheric Aerosol and Gas Experiment (SAGE) III  
measurements: A study on the retrieval of ozone, nitrogen dioxide, and aerosol extinction coefficients, *J. Geophys. Res.*, 107,  
1-21, doi:10.1029/2001jd001576, 2002.

Brohede, S. M., Haley, C. S., McLinden, C. A., Sioris, C. E., Murtagh, D. P., Petelina, S. V., Llewellyn, E. J., Bazureau,  
A., Goutail, F., Randall, C. E., Lumpe, J. D., Taha, G., Thomasson, L. W., and Gordley, L. L.: Validation of Odin/OSIRIS  
905 stratospheric NO<sub>2</sub> profiles, *J. Geophys. Res.-Atmos.*, 112, 1-22, doi:10.1029/2006JD007586, 2007.

Browne, E. C., Perring, A. E., Wooldridge, P. J., Apel, E., Hall, S. R., Huey, L. G., Mao, J., Spencer, K. M., St Clair,  
J. M., Weinheimer, A. J., Wisthaler, A., and Cohen, R. C.: Global and regional effects of the photochemistry of CH<sub>3</sub>O<sub>2</sub>NO<sub>2</sub>:  
evidence from ARCTAS, *Atmos. Chem. Phys.*, 11, 4209-4219, doi:10.5194/acp-11-4209-2011, 2011.

Bucsela, E. J., Krotkov, N. A., Celarier, E. A., Lamsal, L. N., Swartz, W. H., Bhartia, P. K., Boersma, K. F., Veefkind,  
900 J. P., Gleason, J. F., and Pickering, K. E.: A new stratospheric and tropospheric NO<sub>2</sub>; retrieval algorithm for nadir-viewing  
satellite instruments: applications to OMI, *Atmos. Meas. Tech.*, 6, 2607-2626, doi:10.5194/amt-6-2607-2013, 2013.

Cecil, D. J., Buechler, D. E., and Blakeslee, R. J.: Gridded lightning climatology from TRMM-LIS and OTD: Dataset  
description, *Atmos. Res.*, 135, 404-414, doi:10.1016/j.atmosres.2012.06.028, 2014.

Cede, A., Tiefengraber, M., Gebetsberger, M., and Kreuter, A.: Fiducial reference measurements for air quality: TN on  
905 PGN products "correct use" guidelines, version 1, LuftBlick, Innsbruck, Austria, [https://www.pandonia-global-  
network.org/wp-content/uploads/2020/01/LuftBlick\\_FRM4AQ\\_PGNUserGuidelines\\_RP\\_2019009\\_v1.pdf](https://www.pandonia-global-network.org/wp-content/uploads/2020/01/LuftBlick_FRM4AQ_PGNUserGuidelines_RP_2019009_v1.pdf) (Last accessed: 4  
February 2020), 2019.

Chang, W. L., Bhawe, P. V., Brown, S. S., Riemer, N., Stutz, J., and Dabdub, D.: Heterogeneous atmospheric chemistry,  
ambient measurements, and model calculations of N<sub>2</sub>O<sub>5</sub>: A review, *Aerosol Sci. Tech.*, 45, 665-695,  
910 doi:10.1080/02786826.2010.551672, 2011.

Choi, S., Joiner, J., Choi, Y., Duncan, B. N., Vasilkov, A., Krotkov, N., and Bucsela, E.: First estimates of global free-  
tropospheric NO<sub>2</sub> abundances derived using a cloud-slicing technique applied to satellite observations from the Aura Ozone  
Monitoring Instrument (OMI), *Atmos. Chem. Phys.*, 14, 10565-10588, doi:10.5194/acp-14-10565-2014, 2014.

Compernelle, S., Argyrouli, A., Lutz, R., Sneep, M., Lambert, J. C., Fjæraa, A. M., Hubert, D., Keppens, A., Loyola,  
915 D., O'Connor, E., Romahn, F., Stammes, P., Verhoelst, T., and Wang, P.: Validation of the Sentinel-5 Precursor TROPOMI  
cloud data with Cloudnet, Aura OMI O<sub>2</sub>-O<sub>2</sub>, MODIS and Suomi-NPP VIIRS, Atmos. Meas. Tech. Discuss., 2020, 1-33,  
doi:10.5194/amt-2020-122, 2020.

Crawford, J., Davis, D., Olson, J., Chen, G., Liu, S., Fuelberg, H., Hannan, J., Kondo, Y., Anderson, B., Gregory, G.,  
Sachse, G., Talbot, R., Viggiano, A., Heikes, B., Snow, J., Singh, H., and Blake, D.: Evolution and chemical consequences of  
920 lightning-produced NO<sub>x</sub> observed in the North Atlantic upper troposphere, J. Geophys. Res.-Atmos., 105, 19795-19809,  
doi:10.1029/2000JD900183, 2000.

Crutzen, P. J.: The influence of nitrogen oxides on the atmospheric ozone content, Quarterly Journal of the Royal  
Meteorological Society, 96, 320-325, doi:10.1002/qj.49709640815, 1970.

Dahlmann, K., Grewe, V., Ponater, M., and Matthes, S.: Quantifying the contributions of individual NO<sub>x</sub> sources to the  
925 trend in ozone radiative forcing, Atmos. Environ., 45, 2860-2868, doi:10.1016/j.atmosenv.2011.02.071, 2011.

Dirksen, R. J., Boersma, K. F., Eskes, H. J., Ionov, D. V., Bucsela, E. J., Levelt, P. F., and Kelder, H. M.: Evaluation  
of stratospheric NO<sub>2</sub> retrieved from the Ozone Monitoring Instrument: Intercomparison, diurnal cycle, and trending, J.  
Geophys. Res., 11610.1029/2010jd014943, 2011.

Dubé, K., Bourassa, A., Zawada, D., Degenstein, D., Damadeo, R., Flittner, D., and Randel, W.: Accounting for the  
930 photochemical variation of stratospheric NO<sub>2</sub> in the SAGE III/ISS solar occultation retrieval, Atmos. Meas. Tech., 1-15,  
doi:10.5194/amt-2020-331, 2020.

Ehhalt, D. H., Rohrer, F., and Wahner, A.: Sources and distribution of NO<sub>x</sub> in the upper troposphere at northern  
midlatitudes, J. Geophys. Res.-Atmos., 97, 3725-3738, doi:10.1029/91JD03081, 1992.

Finney, D. L., Doherty, R. M., Wild, O., Huntrieser, H., Pumphrey, H. C., and Blyth, A. M.: Using cloud ice flux to  
935 parametrise large-scale lightning, Atmos. Chem. Phys., 14, 12665-12682, doi:10.5194/acp-14-12665-2014, 2014.

Finney, D. L., Doherty, R. M., Wild, O., Stevenson, D. S., MacKenzie, I. A., and Blyth, A. M.: A projected decrease in  
lightning under climate change, Nat Clim Change, 8, 210-213, doi:10.1038/s41558-018-0072-6, 2018.

Finney, D. L., Doherty, R. M., Wild, O., Young, P. J., and Butler, A.: Response of lightning NO<sub>x</sub> emissions and ozone  
production to climate change: Insights from the Atmospheric Chemistry and Climate Model Intercomparison Project, Geophys.  
940 Res. Lett., 43, 5492-5500, doi:10.1002/2016gl068825, 2016.

Frieß, U., Monks, P. S., Remedios, J. J., Rozanov, A., Sinreich, R., Wagner, T., and Platt, U.: MAX-DOAS O<sub>4</sub>  
measurements: A new technique to derive information on atmospheric aerosols: 2. Modeling studies, J. Geophys. Res.-Atmos.,  
111, 1-20, doi:10.1029/2005JD006618, 2006.

Gil, M., Yela, M., Gunn, L. N., Richter, A., Alonso, I., Chipperfield, M. P., Cuevas, E., Iglesias, J., Navarro, M.,  
945 Puente-dura, O., and Rodriguez, S.: NO<sub>2</sub> climatology in the northern subtropical region: diurnal, seasonal and interannual  
variability, Atmos. Chem. Phys., 8, 1635-1648, doi:10.5194/acp-8-1635-2008, 2008.

Gil-Ojeda, M., Navarro-Comas, M., Gomez-Martin, L., Adame, J. A., Saiz-Lopez, A., Cuevas, C. A., Gonzalez, Y., Puertedura, O., Cuevas, E., Lamarque, J. F., Kinnison, D., and Tilmes, S.: NO<sub>2</sub> seasonal evolution in the north subtropical free troposphere, *Atmos. Chem. Phys.*, 15, 10567-10579, doi:10.5194/acp-15-10567-2015, 2015.

950 Gomez, L., Navarro-Comas, M., Puertedura, O., Gonzalez, Y., Cuevas, E., and Gil-Ojeda, M.: Long-path averaged mixing ratios of O<sub>3</sub> and NO<sub>2</sub> in the free troposphere from mountain MAX-DOAS, *Atmos. Meas. Tech.*, 7, 3373-3386, doi:10.5194/amt-7-3373-2014, 2014.

Gruzdev, A. N. and Elokhov, A. S.: Variability of stratospheric and tropospheric nitrogen dioxide observed by the visible spectrophotometer at Zvenigorod, Russia, *International Journal of Remote Sensing*, 32, 3115-3127, 955 doi:10.1080/01431161.2010.541524, 2011.

Hains, J. C., Boersma, K. F., Kroon, M., Dirksen, R. J., Cohen, R. C., Perring, A. E., Bucsel, E., Volten, H., Swart, D. P. J., Richter, A., Wittrock, F., Schoenhardt, A., Wagner, T., Ibrahim, O. W., van Roozendaal, M., Pinardi, G., Gleason, J. F., Veeckind, J. P., and Levelt, P.: Testing and improving OMI DOMINO tropospheric NO<sub>2</sub> using observations from the DANDELIONS and INTEX-B validation campaigns, *J. Geophys. Res.*, 115, 1029/2009jd012399, 2010.

960 Henderson, B. H., Pinder, R. W., Crooks, J., Cohen, R. C., Carlton, A. G., Pye, H. O. T., and Vizuete, W.: Combining Bayesian methods and aircraft observations to constrain the HO<sup>•</sup> + NO<sub>2</sub> reaction rate, *Atmos. Chem. Phys.*, 12, 653-667, doi:10.5194/acp-12-653-2012, 2012.

Henderson, B. H., Pinder, R. W., Crooks, J., Cohen, R. C., Hutzell, W. T., Sarwar, G., Goliff, W. S., Stockwell, W. R., Fahr, A., Mathur, R., Carlton, A. G., and Vizuete, W.: Evaluation of simulated photochemical partitioning of oxidized nitrogen 965 in the upper troposphere, *Atmos. Chem. Phys.*, 11, 275-291, doi:10.5194/acp-11-275-2011, 2011.

Herman, J., Cede, A., Spinei, E., Mount, G., Tzortziou, M., and Abuhassan, N.: NO<sub>2</sub> column amounts from ground-based Pandora and MFDOAS spectrometers using the direct-sun DOAS technique: Intercomparisons and application to OMI validation, *J. Geophys. Res.-Atmos.*, 114, 1-20, doi:10.1029/2009jd011848, 2009.

Holmes, C. D., Bertram, T. H., Confer, K. L., Graham, K. A., Ronan, A. C., Wirks, C. K., and Shah, V.: The role of 970 clouds in the tropospheric NO<sub>x</sub> cycle: A new modeling approach for cloud chemistry and its global implications, *Geophys. Res. Lett.*, 46, 4980-4990, doi:10.1029/2019GL081990, 2019.

Hönniger, G., von Friedeburg, C., and Platt, U.: Multi axis differential optical absorption spectroscopy (MAX-DOAS), *Atmos. Chem. Phys.*, 4, 231-254, doi:10.5194/acp-4-231-2004, 2004.

Ialongo, I., Virta, H., Eskes, H., Hovila, J., and Douros, J.: Comparison of TROPOMI/Sentinel-5 Precursor NO<sub>2</sub> 975 observations with ground-based measurements in Helsinki, *Atmos. Meas. Tech.*, 13, 205-218, doi:10.5194/amt-13-205-2020, 2020.

Jaeglé, L., Jacob, D. J., Wang, Y., Weinheimer, A. J., Ridley, B. A., Campos, T. L., Sachse, G. W., and Hagen, D. E.: Sources and chemistry of NO<sub>x</sub> in the upper troposphere over the United States, *Geophys. Res. Lett.*, 25, 1705-1708, doi:10.1029/97gl03591, 1998.

980 Jiang, Z., McDonald, B. C., Worden, H., Worden, J. R., Miyazaki, K., Qu, Z., Henze, D. K., Jones, D. B. A., Arellano,  
A. F., Fischer, E. V., Zhu, L., and Boersma, K. F.: Unexpected slowdown of US pollutant emission reduction in the past  
decade, *PNAS*, 115, 5099, doi:10.1073/pnas.1801191115, 2018.

Joiner, J., Vasilkov, A. P., Gupta, P., Bhartia, P. K., Veefkind, P., Sneep, M., de Haan, J., Polonsky, I., and Spurr, R.:  
Fast simulators for satellite cloud optical centroid pressure retrievals; evaluation of OMI cloud retrievals, *Atmos. Meas. Tech.*,  
985 5, 529-545, doi:10.5194/amt-5-529-2012, 2012.

Jones, A., Walker, K. A., Jin, J. J., Taylor, J. R., Boone, C. D., Bernath, P. F., Brohede, S., Manney, G. L., McLeod, S.,  
Hughes, R., and Daffer, W. H.: Technical Note: A trace gas climatology derived from the Atmospheric Chemistry Experiment  
Fourier Transform Spectrometer (ACE-FTS) data set, *Atmos. Chem. Phys.*, 12, 5207-5220, doi:10.5194/acp-12-5207-2012,  
2012.

990 Kablick III, G. P., Allen, D. R., Fromm, M. D., and Nedoluha, G. E.: Australian PyroCb smoke generates synoptic-  
scale stratospheric anticyclones, *Geophys. Res. Lett.*, 47, 1-9, doi:10.1029/2020GL088101, 2020.

Lamarque, J. F., Brasseur, G. P., Hess, P. G., and Müller, J. F.: Three-dimensional study of the relative contributions  
of the different nitrogen sources in the troposphere, *J. Geophys. Res.-Atmos.*, 101, 22955-22968, doi:10.1029/96JD02160,  
1996.

995 Lambert, J.-C., Keppens, A., Hubert, D., Langerock, B., K.-U. Eichmann, Kleipool, Q., Sneep, M., Verhoelst, T.,  
Wagner, T., Weber, M., Ahn, C., A. Argyrouli, Balis, D., Chan, K. L., Compennolle, S., Smedt, I. D., Eskes, H., Fjæraa, A.  
M., Garane, K., Gleason, J. F., Goutail, F., Granville, J., Hedelt, P., K.-P. Heue, Jaross, G., Koukouli, M., Landgraf, J., Lutz,  
R., Niemeijer, S., A. Pazmiño, Pinardi, G., Pommereau, J.-P., Richter, A., Rozemeijer, N., Sha, M. K., Zweers, D. S., Theys,  
N., Tilstra, G., Torres, O., Valks, P., Vigouroux, C., and Wang, P.: S5P Mission Performance Centre Routine Operations  
1000 Consolidated Validation Report series, Issue #02, Version 02.0.2, [http://www.tropomi.eu/sites/default/files/files/publicS5P-  
MPC-IASB-ROCVR-02.0.2-20190411\\_FINAL.pdf](http://www.tropomi.eu/sites/default/files/files/publicS5P-MPC-IASB-ROCVR-02.0.2-20190411_FINAL.pdf) (Last accessed: 3 February 2020), 2019.

Laughner, J. L., Zhu, Q., and Cohen, R. C.: The Berkeley High Resolution Tropospheric NO<sub>2</sub> product, *Earth System  
Science Data*, 10, 2069-2095, doi:10.5194/essd-10-2069-2018, 2018.

Levelt, P. F., Joiner, J., Tamminen, J., Veefkind, J. P., Bhartia, P. K., Stein Zweers, D. C., Duncan, B. N., Streets, D.  
1005 G., Eskes, H., van der A, R., McLinden, C., Fioletov, V., Carn, S., de Laat, J., DeLand, M., Marchenko, S., McPeters, R.,  
Ziemke, J., Fu, D., Liu, X., Pickering, K., Apituley, A., González Abad, G., Arola, A., Boersma, F., Chan Miller, C., Chance,  
K., de Graaf, M., Hakkarainen, J., Hassinen, S., Ialongo, I., Kleipool, Q., Krotkov, N., Li, C., Lamsal, L., Newman, P., Nowlan,  
C., Suleiman, R., Tilstra, L. G., Torres, O., Wang, H., and Wargan, K.: The Ozone Monitoring Instrument: Overview of 14  
years in space, *Atmos. Chem. Phys.*, 18, 5699-5745, doi:10.5194/acp-18-5699-2018, 2018.

1010 Loyola, D. G., Garcia, S. G., Lutz, R., Argyrouli, A., Romahn, F., Spurr, R. J. D., Pedergrana, M., Doicu, A., Garcia,  
V. M., and Schussler, O.: The operational cloud retrieval algorithms from TROPOMI on board Sentinel-5 Precursor, *Atmos.  
Meas. Tech.*, 11, 409-427, doi:10.5194/amt-11-409-2018, 2018a.

- Loyola, D. G., Lutz, R., Argyrouli, A., and Spurr, R.: S5P/TROPOMI ATBD Cloud Products, <https://sentinel.esa.int/documents/247904/2476257/Sentinel-5P-TROPOMI-ATBD-Clouds> (Last accessed: 20 January 2020), 1015 2018b.
- Loyola, D. G., Thomas, W., Livschitz, Y., Ruppert, T., Albert, P., and Hollmann, R.: Cloud properties derived from GOME/ERS-2 backscatter data for trace gas retrieval, *IEEE T. Geosci. Remote Sens.*, **45**, 2747-2758, doi:10.1109/TGRS.2007.901043, 2007.
- Marais, E. A., Jacob, D. J., Choi, S., Joiner, J., Belmonte-Rivas, M., Cohen, R. C., Beirle, S., Murray, L. T., Schiferl, 1020 L. D., Shah, V., and Jaegle, L.: Nitrogen oxides in the global upper troposphere: Interpreting cloud-sliced NO<sub>2</sub> observations from the OMI satellite instrument, *Atmos. Chem. Phys.*, **18**, 17017-17027, doi:10.5194/acp-18-17017-2018, 2018.
- Mickley, L. J., Murti, P. P., Jacob, D. J., Logan, J. A., Koch, D. M., and Rind, D.: Radiative forcing from tropospheric ozone calculated with a unified chemistry-climate model, *J. Geophys. Res.-Atmos.*, **104**, 30153-30172, doi:10.1029/1999JD900439, 1999.
- 1025 Murray, L. T., Jacob, D. J., Logan, J. A., Hudman, R. C., and Koshak, W. J.: Optimized regional and interannual variability of lightning in a global chemical transport model constrained by LIS/OTD satellite data, *J. Geophys. Res.-Atmos.*, **117**, D20307, doi:10.1029/2012jd017934, 2012.
- Murray, L. T., Logan, J. A., and Jacob, D. J.: Interannual variability in tropical tropospheric ozone and OH: The role of lightning, *J. Geophys. Res.-Atmos.*, **118**, 11468-11480, doi:10.1002/jgrd.50857, 2013.
- 1030 Nault, B. A., Garland, C., Wooldridge, P. J., Brune, W. H., Campuzano-Jost, P., Crounse, J. D., Day, D. A., Dibb, J., Hall, S. R., Huey, L. G., Jimenez, J. L., Liu, X. X., Mao, J. Q., Mikoviny, T., Peischl, J., Pollack, I. B., Ren, X. R., Ryerson, T. B., Scheuer, E., Ullmann, K., Wennberg, P. O., Wisthaler, A., Zhang, L., and Cohen, R. C.: Observational constraints on the oxidation of NO<sub>x</sub> in the upper troposphere, *J. Phys. Chem. A*, **120**, 1468-1478, doi:10.1021/acs.jpca.5b07824, 2016.
- Newchurch, M. J., Allen, M., Gunson, M. R., Salawitch, R. J., Collins, G. B., Huston, K. H., Abbas, M. M., Abrams, 1035 M. C., Chang, A. Y., Fahey, D. W., Gao, R. S., Irion, F. W., Loewenstein, M., Manney, G. L., Michelsen, H. A., Podolske, J. R., Rinsland, C. P., and Zander, R.: Stratospheric NO and NO<sub>2</sub> abundances from ATMOS solar-occultation measurements, *Geophys. Res. Lett.*, **23**, 2373-2376, doi:10.1029/96GL01196, 1996.
- Ott, L. E., Pickering, K. E., Stenchikov, G. L., Allen, D. J., DeCaria, A. J., Ridley, B., Lin, R. F., Lang, S., and Tao, W. K.: Production of lightning NO<sub>x</sub> and its vertical distribution calculated from three-dimensional cloud-scale chemical transport 1040 model simulations, *J. Geophys. Res.-Atmos.*, **115**, 10.1029/2009jd011880, 2010.
- Pavelin, E. G., Johnson, C. E., Rughooputh, S., and Toumi, R.: Evaluation of pre-industrial surface ozone measurements made using Schönbein's method, *Atmos. Environ.*, **33**, 919-929, doi:10.1016/S1352-2310(98)00257-X, 1999.
- Pinardi, G., Van Roozendaal, M., Hendrick, F., Theys, N., Abuhassan, N., Bais, A., Boersma, F., Cede, A., Chong, J., Donner, S., Drosoglou, T., Dzhola, A., Eskes, H., Frieß, U., Granville, J., Herman, J. R., Holla, R., Hovila, J., Irie, H., Kanaya, 1045 Y., Karagkiozidis, D., Kouremeti, N., Lambert, J.-C., Ma, J., Peters, E., Piter, A., Postylyakov, O., Richter, A., Remmers, J., Takashima, H., Tiefengraber, M., Valks, P., Vlemmix, T., Wagner, T., and Wittrock, F.: Validation of tropospheric NO<sub>2</sub>

- column measurements of GOME-2A and OMI using MAX-DOAS and direct sun network observations, *Atmos. Meas. Tech.*, 13, 6141-6174, doi:10.5194/amt-13-6141-2020, 2020.
- Pour-Biazar, A., McNider, R. T., Roselle, S. J., Suggs, R., Jedlovec, G., Byun, D. W., Kim, S., Lin, C. J., Ho, T. C.,  
1050 Haines, S., Dornblaser, B., and Cameron, R.: Correcting photolysis rates on the basis of satellite observed clouds, *J. Geophys. Res.-Atmos.*, 112, 1-17, doi:10.1029/2006JD007422, 2007.
- Price, C. and Rind, D.: A simple lightning parameterization for calculating global lightning distributions, *J. Geophys. Res.-Atmos.*, 97, 9919-9933, doi:10.1029/92JD00719, 1992.
- Puente-dura, O., Gil, M., Saiz-Lopez, A., Hay, T., Navarro-Comas, M., Gómez-Pelaez, A., Cuevas, E., Iglesias, J., and  
1055 Gomez, L.: Iodine monoxide in the north subtropical free troposphere, *Atmos. Chem. Phys.*, 12, 4909-4921, doi:10.5194/acp-12-4909-2012, 2012.
- Randall, C. E., Rusch, D. W., Bevilacqua, R. M., Hoppel, K. W., and Lumpe, J. D.: Polar Ozone and Aerosol Measurement (POAM) II stratospheric NO<sub>2</sub>, 1993-1996, *Journal of Geophysical Research: Atmospheres*, 103, 28361-28371, doi:10.1029/98jd02092, 1998.
- 1060 Reed, C., Evans, M. J., Di Carlo, P., Lee, J. D., and Carpenter, L. J.: Interferences in photolytic NO<sub>2</sub> measurements: explanation for an apparent missing oxidant?, *Atmos. Chem. Phys.*, 16, 4707-4724, doi:10.5194/acp-16-4707-2016, 2016.
- Ridley, B., Ott, L., Pickering, K., Emmons, L., Montzka, D., Weinheimer, A., Knapp, D., Grahek, F., Li, L., Heymsfield, G., McGill, M., Kucera, P., Mahoney, M. J., Baumgardner, D., Schultz, M., and Brasseur, G.: Florida thunderstorms: A faucet of reactive nitrogen to the upper troposphere, *J. Geophys. Res.-Atmos.*, 109, 1-19, doi:10.1029/2004JD004769, 2004.
- 1065 Rivera, C., Stremme, W., and Grutter, M.: Nitrogen dioxide DOAS measurements from ground and space: Comparison of zenith scattered sunlight ground-based measurements and OMI data in Central Mexico, *Atmósfera*, 26, 401-414, doi:10.1016/S0187-6236(13)71085-3, 2013.
- Robles-Gonzalez, C., Navarro-Comas, M., Puente-dura, O., Schneider, M., Hase, F., Garcia, O., Blumenstock, T., and Gil-Ojeda, M.: Intercomparison of stratospheric nitrogen dioxide columns retrieved from ground-based DOAS and FTIR and  
1070 satellite DOAS instruments over the subtropical Izaña station, *Atmos. Meas. Tech.*, 9, 4471-4485, doi:10.5194/amt-9-4471-2016, 2016.
- Romps, D. M., Seeley, J. T., Vollaro, D., and Molinari, J.: Projected increase in lightning strikes in the United States due to global warming, *Science*, 346, 851-854, doi:10.1126/science.1259100, 2014.
- Schenkeveld, V. M. E., Jaross, G., Marchenko, S., Haffner, D., Kleipool, Q. L., Rozemeijer, N. C., Veeffkind, J. P., and  
1075 Levelt, P. F.: In-flight performance of the Ozone Monitoring Instrument, *Atmos. Meas. Tech.*, 10, 1957-1986, doi:10.5194/amt-10-1957-2017, 2017.
- Schreier, S. F., Richter, A., Wittrock, F., and Burrows, J. P.: Estimates of free-tropospheric NO<sub>2</sub> and HCHO mixing ratios derived from high-altitude mountain MAX-DOAS observations at midlatitudes and in the tropics, *Atmos. Chem. Phys.*, 16, 2803-2817, doi:10.5194/acp-16-2803-2016, 2016.

- 1080 Schumann, U.: The impact of nitrogen oxides emissions from aircraft upon the atmosphere at flight altitudes—results from the AERONOX project, *Atmos. Environ.*, 31, 1723-1733, doi:10.1016/S1352-2310(96)00326-3, 1997.
- Schumann, U. and Huntrieser, H.: The global lightning-induced nitrogen oxides source, *Atmos. Chem. Phys.*, 7, 3823-3907, doi:10.5194/acp-7-3823-2007, 2007.
- Silvern, R. F., Jacob, D. J., Mickley, L. J., Sulprizio, M. P., Travis, K. R., Marais, E. A., Cohen, R. C., Laughner, J. L., 1085 Choi, S., Joiner, J., and Lamsal, L. N.: Using satellite observations of tropospheric NO<sub>2</sub> columns to infer long-term trends in US NO<sub>x</sub> emissions: The importance of accounting for the free tropospheric NO<sub>2</sub> background, *Atmos. Chem. Phys.*, 19, 8863-8878, doi:10.5194/acp-19-8863-2019, 2019.
- Silvern, R. F., Jacob, D. J., Travis, K. R., Sherwen, T., Evans, M. J., Cohen, R. C., Laughner, J. L., Hall, S. R., Ullmann, K., Crounse, J. D., Wennberg, P. O., Peischl, J., and Pollack, I. B.: Observed NO/NO<sub>2</sub> ratios in the upper troposphere imply 1090 errors in NO-NO<sub>2</sub>-O<sub>3</sub> cycling kinetics or an unaccounted NO<sub>x</sub> reservoir, *Geophys. Res. Lett.*, 45, 4466-4474, doi:10.1029/2018GL077728, 2018.
- Sioris, C. E., Kurosu, T. P., Martin, R. V., and Chance, K.: Stratospheric and tropospheric NO<sub>2</sub> observed by SCIAMACHY: First results, *Adv. Spac Res.*, 34, 780-785, doi:10.1016/j.asr.2003.08.066, 2004.
- Stammes, P., Sneep, M., de Haan, J. F., Veeckind, J. P., Wang, P., and Levelt, P. F.: Effective cloud fractions from the 1095 Ozone Monitoring Instrument: Theoretical framework and validation, *J. Geophys. Res.-Atmos.*, 113, 1-12, doi:10.1029/2007JD008820, 2008.
- Stavrakou, T., Muller, J. F., Boersma, K. F., van der A, R. J., Kurokawa, J., Ohara, T., and Zhang, Q.: Key chemical NO<sub>x</sub> sink uncertainties and how they influence top-down emissions of nitrogen oxides, *Atmos. Chem. Phys.*, 13, 9057-9082, doi:10.5194/acp-13-9057-2013, 2013.
- 1100 Stettler, M. E. J., Eastham, S., and Barrett, S. R. H.: Air quality and public health impacts of UK airports. Part I: Emissions, *Atmos. Environ.*, 45, 5415-5424, doi:10.1016/j.atmosenv.2011.07.012, 2011.
- Stratmann, G., Ziereis, H., Stock, P., Brenninkmeijer, C. A. M., Zahn, A., Rauthe-Schoch, A., Velthoven, P. V., Schlager, H., and Volz-Thomas, A.: NO and NO<sub>y</sub> in the upper troposphere: Nine years of CARIBIC measurements onboard a passenger aircraft, *Atmos. Environ.*, 133, 93-111, doi:10.1016/j.atmosenv.2016.02.035, 2016.
- 1105 Thomas, K., Berg, M., Boulanger, D., Houben, N., Gressent, A., Nedelec, P., Patz, H. W., Thouret, V., and Volz-Thomas, A.: Climatology of NO<sub>y</sub> in the troposphere and UT/LS from measurements made in MOZAIC, *Tellus B*, 67, 1-16, doi:10.3402/tellusb.v67.28793, 2015.
- Toledano, C., Gonzalez, R., Fuentes, D., Cuevas, E., Eck, T. F., Kazadzis, S., Kouremeti, N., Grobner, J., Goloub, P., Blarel, L., Roman, R., Barreto, A., Berjon, A., Holben, B. N., and Cachorro, V. E.: Assessment of Sun photometer Langley 1110 calibration at the high-elevation sites Mauna Loa and Izaña, *Atmos. Chem. Phys.*, 18, 14555-14567, doi:10.5194/acp-18-14555-2018, 2018.
- Torres, O., Bhartia, P. K., Jethva, H., and Ahn, C.: Impact of the ozone monitoring instrument row anomaly on the long-term record of aerosol products, *Atmos. Meas. Tech.*, 11, 2701-2715, doi:10.5194/amt-11-2701-2018, 2018.



Tost, H., Jockel, P. J., and Lelieveld, J.: Lightning and convection parameterisations - uncertainties in global modelling,  
 1115 Atmos. Chem. Phys., 7, 4553-4568, doi:10.5194/acp-7-4553-2007, 2007.

Travis, K. R., Jacob, D. J., Fisher, J. A., Kim, P. S., Marais, E. A., Zhu, L., Yu, K., Miller, C. C., Yantosca, R. M.,  
 Sulprizio, M. P., Thompson, A. M., Wennberg, P. O., Crounse, J. D., St Clair, J. M., Cohen, R. C., Laughner, J. L., Dibb, J.  
 E., Hall, S. R., Ullmann, K., Wolfe, G. M., Pollack, I. B., Peischl, J., Neuman, J. A., and Zhou, X. L.: Why do models  
 overestimate surface ozone in the Southeast United States?, Atmos. Chem. Phys., 16, 13561-13577, doi:10.5194/acp-16-  
 1120 13561-2016, 2016.

van der A, R. J., de Laat, A. T. J., Ding, J., and Eskes, H. J.: Connecting the dots: NO<sub>x</sub> emissions along a West Siberian  
 natural gas pipeline, NPJ Clim. Atmos. Sci., 3, 16, doi:10.1038/s41612-020-0119-z, 2020.

van Geffen, J., Boersma, K. F., Eskes, H., Sneep, M., ter Linden, M., Zara, M., and Veefkind, J. P.: S5P TROPOMI  
 NO<sub>2</sub> slant column retrieval: Method, stability, uncertainties and comparisons with OMI, Atmos. Meas. Tech., 13, 1315-1335,  
 1125 doi:10.5194/amt-13-1315-2020, 2020.

van Geffen, J., Eskes, H. J., Boersma, K. F., Maasakkers, J. D., and Veefkind, J. P.: TROPOMI ATBD of the total and  
 tropospheric NO<sub>2</sub> data products, [https://sentinel.esa.int/documents/247904/2476257/Sentinel-5P-TROPOMI-ATBD-NO2-](https://sentinel.esa.int/documents/247904/2476257/Sentinel-5P-TROPOMI-ATBD-NO2-data-products)  
[data-products](https://sentinel.esa.int/documents/247904/2476257/Sentinel-5P-TROPOMI-ATBD-NO2-data-products) (Last accessed: 20 January 2020), 2019.

Veefkind, J. P., de Haan, J. F., Sneep, M., and Levelt, P. F.: Improvements to the OMI O<sub>2</sub>-O<sub>2</sub> operational cloud  
 1130 algorithm and comparisons with ground-based radar-lidar observations, Atmos. Meas. Tech., 9, 6035-6049, doi:10.5194/amt-  
 9-6035-2016, 2016.

Verhoelst, T., Compernelle, S., Pinardi, G., Lambert, J.-C., Eskes, H. J., Eichmann, K.-U., Fjæraa, A. M., Granville, J.,  
 Niemeijer, S., Cede, A., Tiefengraber, M., Hendrick, F., Pazmiño, A., Bais, A., Bazureau, A., Boersma, K. F., Bognar, K.,  
 Dehn, A., Donner, S., Elokhorov, A., Gebetsberger, M., Goutail, F., Grutter de la Mora, M., Gruzdev, A., Gratsea, M., Hansen,  
 1135 G. H., Irie, H., Jepsen, N., Kanaya, Y., Karagkiozidis, D., Kivi, R., Kreher, K., Levelt, P. F., Liu, C., Müller, M., Navarro  
 Comas, M., PETERS, A. J. M., Pommereau, J.-P., Portafaix, T., Prados-Roman, C., Puertedura, O., Querel, R., Remmers, J.,  
 Richter, A., Rimmer, J., Rivera Cárdenas, C., Saavedra de Miguel, L., Sinyakov, V. P., Stremme, W., Strong, K., Van  
 Roozendael, M., Veefkind, J. P., Wagner, T., Wittrock, F., Yela González, M., and Zehner, C.: Ground-based validation of the  
 Copernicus Sentinel-5P TROPOMI NO<sub>2</sub> measurements with the NDACC ZSL-DOAS, MAX-DOAS and Pandonia global  
 1140 networks, Atmos. Meas. Tech., 14, 481-510, doi:10.5194/amt-14-481-2021, 2021.

Verlinden, K. L., Thompson, D. W. J., and Stephens, G. L.: The three-dimensional distribution of clouds over the  
 southern hemisphere high latitudes, J. Climate, 24, 5799-5811, doi:10.1175/2011JCLI3922.1, 2011.

Wang, P., PETERS, A., van Geffen, J., Tuinder, O., Stammes, P., and Kinne, S.: Shipborne MAX-DOAS measurements  
 for validation of TROPOMI NO<sub>2</sub> products, Atmos. Meas. Tech., 13, 1413-1426, doi:10.5194/amt-13-1413-2020, 2020a.

1145 Wang, P., Stammes, P., van der A, R., Pinardi, G., and van Roozendael, M.: FRESKO+: An improved O<sub>2</sub> A-band cloud  
 retrieval algorithm for tropospheric trace gas retrievals, Atmos. Chem. Phys., 8, 6565-6576, doi:10.5194/acp-8-6565-2008,  
 2008.

Wang, Z., Zhang, X., Liu, L., Cheng, M., and Xu, J.: Spatial and seasonal patterns of atmospheric nitrogen deposition in North China, *Atmos. Ocean. Sci. Lett.*, 13, 188-194, doi:10.1080/16742834.2019.1701385, 2020b.

Wendisch, M., Pöschl, U., Andreae, M. O., Machado, L. A. T., Albrecht, R., Schlager, H., Rosenfeld, D., Martin, S. T., Abdelmonem, A., Afchine, A., Araújo, A. C., Artaxo, P., Aufmhoff, H., Barbosa, H. M. J., Borrmann, S., Braga, R., Buchholz, B., Cecchini, M. A., Costa, A., Curtius, J., Dollner, M., Dorf, M., Dreiling, V., Ebert, V., Ehrlich, A., Ewald, F., Fisch, G., Fix, A., Frank, F., Fütterer, D., Heckl, C., Heidelberg, F., Hüneke, T., Jäkel, E., Järvinen, E., Jurkat, T., Kanter, S., Kästner, U., Kenntner, M., Kesselmeier, J., Klimach, T., Knecht, M., Kohl, R., Kölling, T., Krämer, M., Krüger, M., Krisna, T. C., Lavric, J. V., Longo, K., Mahnke, C., Manzi, A. O., Mayer, B., Mertes, S., Minikin, A., Molleker, S., Münch, S., Nillius, B., Pfeilsticker, K., Pöhlker, C., Roiger, A., Rose, D., Rosenow, D., Sauer, D., Schnaiter, M., Schneider, J., Schulz, C., de Souza, R. A. F., Spanu, A., Stock, P., Vila, D., Voigt, C., Walser, A., Walter, D., Weigel, R., Weinzierl, B., Werner, F., Yamasoe, M. A., Ziereis, H., Zinner, T., and Zöger, M.: ACRIDICON-CHUVA campaign: Studying tropical deep convective clouds and precipitation over Amazonia using the new German research aircraft HALO, *BAMS*, 97, 1885-1908, doi:10.1175/BAMS-D-14-00255.1, 2016.

Williams, J. E., Boersma, K. F., Le Sager, P., and Verstraeten, W. W.: The high-resolution version of TM5-MP for optimized satellite retrievals: description and validation, *Geosci. Model Dev.*, 10, 721-750, doi:10.5194/gmd-10-721-2017, 2017.

Worden, H. M., Bowman, K. W., Kulawik, S. S., and Aghedo, A. M.: Sensitivity of outgoing longwave radiative flux to the global vertical distribution of ozone characterized by instantaneous radiative kernels from Aura-TES, *J. Geophys. Res.-Atmos.*, 116, 1-15, doi:10.1029/2010jd015101, 2011.

Zhao, B., Wang, S. X., Liu, H., Xu, J. Y., Fu, K., Klimont, Z., Hao, J. M., He, K. B., Cofala, J., and Amann, M.: NO<sub>x</sub> emissions in China: historical trends and future perspectives, *Atmos. Chem. Phys.*, 13, 9869-9897, doi:10.5194/acp-13-9869-2013, 2013.

Ziemke, J. R., Chandra, S., and Bhartia, P. K.: "Cloud slicing": A new technique to derive upper tropospheric ozone from satellite measurements, *J. Geophys. Res.-Atmos.*, 106, 9853-9867, doi:10.1029/2000jd900768, 2001.

▼

▲

|                      |               |                     |
|----------------------|---------------|---------------------|
| Page 16: [1] Deleted | Eloise Marais | 23/01/2021 13:57:00 |
|----------------------|---------------|---------------------|

|                      |               |                     |
|----------------------|---------------|---------------------|
| Page 16: [2] Deleted | Eloise Marais | 23/01/2021 14:05:00 |
|----------------------|---------------|---------------------|

|                      |               |                     |
|----------------------|---------------|---------------------|
| Page 16: [3] Deleted | Eloise Marais | 23/01/2021 13:58:00 |
|----------------------|---------------|---------------------|

|                      |               |                     |
|----------------------|---------------|---------------------|
| Page 16: [4] Deleted | Eloise Marais | 23/10/2020 15:46:00 |
|----------------------|---------------|---------------------|

|                      |               |                     |
|----------------------|---------------|---------------------|
| Page 16: [5] Deleted | Eloise Marais | 23/01/2021 14:07:00 |
|----------------------|---------------|---------------------|

|                      |               |                     |
|----------------------|---------------|---------------------|
| Page 16: [6] Deleted | Eloise Marais | 23/01/2021 14:09:00 |
|----------------------|---------------|---------------------|
